# Supplementary material for: nBu4NI-catalyzed C3-formylation of indoles with N-methylaniline
Source: Royal Society of Chemistry journal article supplement (doi:10.1039/c2cc31578e), 2012-01-01
Supplement: c2cc31578e.pdf [file c2cc31578e.pdf]

## **SUPPORTING INFORMATION FOR**

### ***n*Bu<sub>4</sub>NI-catalyzed C3-formylation of indoles with N-methylaniline**

Lan-Tao Li, Juan Huang, Hong-Ying Li, Li-Juan Wen, Peng Wang and Bin Wang

*College of Pharmacy, State Key Laboratory of Medicinal Chemical Biology and  
Tianjin Key Laboratory of Molecular Drug Research, Nankai University, 94 Weijin  
Road, Tianjin 300071, China.*

*Corresponding author: Bin Wang*

*wangbin@nankai.edu.cn*

## **Table of Contents**

- 1. General experimental methods**
- 2. General procedure for the *n*Bu<sub>4</sub>NI-catalyzed formylation of indoles with N-methylaniline**
- 3. Optimization of reaction conditions**
- 4. Preparation of 3-formylindole with compound 5**
- 5. The characterization of the products**
- 6. <sup>1</sup>H and <sup>13</sup>C NMR charts of the products**
- 7. References**

## 1. General experimental methods

$^1\text{H}$  NMR and  $^{13}\text{C}$  NMR spectra were recorded on a Bruker AVANCE AV400 (400MHz and 100MHz). Signal positions were recorded in ppm with the abbreviations s, d, t, m and b denoting singlet, doublet, triplet, multiplet and broadened respectively. All NMR chemical shifts were referenced to residual solvent peaks or to  $\text{Si}(\text{CH}_3)_4$  as an internal standard, spectra recorded in  $\text{CDCl}_3$  were referenced to residual  $\text{CHCl}_3$  at 7.26 ppm for  $^1\text{H}$  or 77.0 ppm for  $^{13}\text{C}$ , spectra recorded in  $\text{CD}_3\text{OD}$  were referenced to residual  $\text{CD}_2\text{HOD}$  at 3.31 ppm for  $^1\text{H}$  or 49.15 ppm for  $^{13}\text{C}$ , spectra recorded in  $(\text{CD}_3)_2\text{SO}$  were referenced to residual  $(\text{CD}_2\text{H})\text{SO}(\text{CD}_3)$  at 2.50 ppm for  $^1\text{H}$  or 39.52 ppm for  $^{13}\text{C}$ . All coupling constants  $J$  were quoted in Hz. Data were reported as follows: chemical shift, multiplicity, coupling constant and integration. Reactions were monitored by thin-layer chromatography (TLC) on 0.25mm silica gel glass plates coated with 60 F<sub>254</sub>. Column chromatography was performed on silica gel (200-300 mesh) using a mixture of petroleum ether (60-90°C)/ethyl acetate as eluant. Reactions were carried out under a nitrogen atmosphere. Commercially available reagents were used as received without purification.

## 2. General procedure for the $\text{Bu}_4\text{NI}$ -catalyzed formylation of indoles with N-methylaniline

To a mixture of indole (0.5 mmol, 1 equiv), PivOH (255.3 mg, 2.5 mmol, 5 equiv), and  $n\text{BuNI}$  (18.5 mg, 0.05 mmol, 0.1 equiv) in a 50 mL Schlenk tube were added DMSO (1 mL) under  $\text{N}_2$ . Then N-methylaniline (107  $\mu\text{L}$ , 1.0 mmol, 2 equiv) and TBPB (373  $\mu\text{L}$ , 2.0 mmol, 4 equiv) were added separately. The mixture was stirred at 80°C for 8h, quenched with saturated  $\text{NaHCO}_3$  solution (10 mL). The mixture was extracted by ethyl acetate for 3 times. The combined organic phase was washed with brine and dried with anhydrous  $\text{Na}_2\text{SO}_4$ , filtrated, and concentrated under reduced pressure. The residue was purified by silica gel column chromatography to give the formylation products.

### 3. Optimization of reaction conditions<sup>a</sup>

| entry <sup>a</sup> | 1a (mmol) | 2a (mmol) | catalyst<br>(mmol)                  | oxidant (mmol)                                   | Yield<br>(%)    |
|--------------------|-----------|-----------|-------------------------------------|--------------------------------------------------|-----------------|
| 1                  | 0.5       | 1         | <i>n</i> Bu <sub>4</sub> NCl (0.05) | TBPB (2)                                         | 37 <sup>b</sup> |
| 2                  | 0.5       | 1         | <i>n</i> Bu <sub>4</sub> NBr (0.05) | TBPB (2)                                         | 29 <sup>b</sup> |
| 3                  | 0.5       | 1         | <i>n</i> Bu <sub>4</sub> NI (0.05)  | TBHP(2) <sup>c</sup>                             | 0               |
| 4                  | 0.5       | 1         | <i>n</i> Bu <sub>4</sub> NI (0.05)  | IBX (2)                                          | trace           |
| 5                  | 0.5       | 1         | <i>n</i> Bu <sub>4</sub> NI (0.05)  | NBS (2)                                          | trace           |
| 6                  | 0.5       | 1         | <i>n</i> Bu <sub>4</sub> NI (0.05)  | NIS (2)                                          | 0               |
| 7                  | 0.5       | 1         | <i>n</i> Bu <sub>4</sub> NI (0.05)  | PhI(OAc) <sub>2</sub> (2)                        | trace           |
| 8                  | 0.5       | 1         | <i>n</i> Bu <sub>4</sub> NI (0.05)  | Oxone (2)                                        | 0               |
| 9                  | 0.5       | 1         | <i>n</i> Bu <sub>4</sub> NI (0.05)  | K <sub>2</sub> S <sub>2</sub> O <sub>8</sub> (2) | 0               |
| 10                 | 0.5       | 1         | <i>n</i> Bu <sub>4</sub> NI (0.05)  | <i>m</i> -CPBA (2)                               | 0               |
| 11                 | 0.5       | 1         | <i>n</i> Bu <sub>4</sub> NI (0.05)  | <i>p</i> -BQ (2)                                 | 0               |
| 12                 | 0.5       | 1         | <i>n</i> Bu <sub>4</sub> NI(0.05)   | DDQ (2)                                          | 0               |

<sup>a</sup>general reaction conditions: to a mixture of indole (0.5mmol), catalyst (0.05mmol), PivOH (2.5mmol), oxidant (2mmol) in a schlank tube was added DMSO (1mL) under N<sub>2</sub>. N-methylaniline (1.0mmol) was added, then the mixture was heated at 80°C for 8h. <sup>b</sup>GC yield. <sup>c</sup>solution of TBHP in decane (5.0-6.0M) was used.

#### 4. Preparation of 3-formylindole with compound **5**

To a mixture of compound **5** (0.5 mmol, 1 equiv), PivOH (255.3 mg, 2.5 mmol, 5 equiv), and *n*BuNI (18.5 mg, 0.05 mmol, 0.1 equiv) in a 50 mL Schlenk tube were added DMSO (1 mL) under N<sub>2</sub>. Then TBPB (373  $\mu$ L, 2.0 mmol, 4 equiv) were added separately. The mixture was stirred at 80°C for 8h, quenched with saturated NaHCO<sub>3</sub> solution (10 mL). The mixture was extracted by ethyl acetate for 3 times. The combined organic phase was washed with brine and dried with anhydrous Na<sub>2</sub>SO<sub>4</sub>, filtrated, and concentrated under reduced pressure. The residue was purified by silica gel column chromatography to give the formylation product **3a** in 70% yield.

## 5. The characterization of the products

### **3a<sup>1</sup>**

<sup>1</sup>H-NMR (DMSO-*d*<sub>6</sub>, 400MHz): 12.1 (b, 1H), 9.94(s, 1H), 8.29(s, 1H), 8.10(d, 7.2Hz, 1H), 7.51(d, 8.0Hz, 1H), 7.28-7.20(m, 2H)

<sup>13</sup>C-NMR (DMSO-*d*<sub>6</sub>, 100MHz): 185.00, 138.53, 137.07, 124.14, 123.49, 122.16, 120.85, 118.18, 112.45

### **3b<sup>1</sup>**

<sup>1</sup>H-NMR (DMSO-*d*<sub>6</sub>, 400MHz): 12.2(b, 1H), 9.92(s, 1H), 8.35(d, 3.2Hz, 1H), 7.76(dd, 2.4Hz, 9.6Hz, 1H), 7.53(dd, 4.8Hz, 8.8Hz, 1H), 7.11(td, 2.8Hz, 9.2Hz, 1H)

<sup>13</sup>C-NMR (DMSO-*d*<sub>6</sub>, 100MHz): 185.04, 158.74 (239.6Hz), 139.63, 133.61, 124.73 (7Hz), 118.14, 113.77 (9.5Hz), 111.61 (25.8Hz), 105.70 (24.3Hz)

### **3c<sup>1</sup>**

<sup>1</sup>H-NMR (DMSO-*d*<sub>6</sub>, 400MHz): 12.3(b, 1H), 9.93(s, 1H), 8.36(d, 3.2Hz, 1H), 8.06(d, 2.2Hz, 1H), 7.54(d, 8.4Hz, 1H), 7.28(dd, 2.2Hz, 8.6Hz, 1H)

<sup>13</sup>C-NMR (DMSO-*d*<sub>6</sub>, 100MHz): 185.10, 139.39, 135.48, 126.77, 125.27, 123.47, 119.87, 117.55, 114.11

### **3d<sup>2</sup>**

<sup>1</sup>H-NMR (CD<sub>3</sub>OD, 400MHz): 9.86(s, 1H), 8.05(s, 1H), 7.99(d, 8.0Hz, 1H), 7.16(t, 7.6Hz, 1H), 7.09(d, 7.2Hz, 1H), 2.90(q, 7.6Hz, 2H), 1.31(t, 7.6Hz, 3H)

<sup>13</sup>C-NMR (CD<sub>3</sub>OD, 100MHz): 187.57, 139.56, 137.63, 129.50, 125.84, 124.13, 124.00, 120.57, 120.20, 25.21, 15.10

<sup>1</sup>H-NMR (DMSO-*d*<sub>6</sub>, 400MHz): 12.1(b, 1H), 9.93(s, 1H), 8.27(d, 3.2Hz, 1H), 7.93(d, 7.6Hz, 1H), 7.15(t, 7.6Hz, 1H), 7.08(d, 7.2Hz, 1H), 2.89(t, 7.4Hz, 2H), 1.26(t, 7.4Hz, 3H)

<sup>13</sup>C-NMR (DMSO-*d*<sub>6</sub>, 100MHz): 184.92, 138.12, 135.74, 128.04, 124.08, 122.42,

122.25, 118.56, 118.43, 23.52, 14.55

**3e<sup>3</sup>**

<sup>1</sup>H-NMR (DMSO-*d*<sub>6</sub>, 400MHz): 12.2(b, 1H), 9.93(s, 1H), 8.32(d, 3.2Hz, 1H), 8.02(d, 8.4Hz, 1H), 7.71(d, 1.6Hz, 1H), 7.36(dd, 1.6Hz, 8.4Hz, 1H)

<sup>13</sup>C-NMR (DMSO-*d*<sub>6</sub>, 100MHz): 185.15, 139.18, 137.91, 125.05, 123.14, 122.46, 117.97, 115.91, 115.15

**3f<sup>1</sup>**

<sup>1</sup>H-NMR (DMSO-*d*<sub>6</sub>, 400MHz): 12.3(b, 1H), 9.91(s, 1H), 8.43(d, 1.6Hz, 1H), 8.30(d, 3.2Hz, 1H), 7.54(dd, 1.6Hz, 8.6Hz, 1H), 7.37(d, 8.4Hz, 1H)

<sup>13</sup>C-NMR (DMSO-*d*<sub>6</sub>, 100MHz): 185.15, 138.89, 136.15, 131.53, 129.12, 126.60, 117.14, 114.92, 86.58

**3g<sup>1</sup>**

<sup>1</sup>H-NMR (CD<sub>3</sub>OD, 400MHz): 10.0(s, 1H), 8.09(d, 7.2Hz, 1H), 7.34(d, 7.2Hz, 1H), 7.18(t, 4.4Hz, 2H), 2.70(s, 3H)

<sup>13</sup>C-NMR (CD<sub>3</sub>OD, 100MHz): 186.55, 151.03, 137.34, 127.38, 124.33, 123.57, 121.68, 115.60, 112.33, 11.80

**3h<sup>4</sup>**

<sup>1</sup>H-NMR (DMSO-*d*<sub>6</sub>, 400MHz): 12.3(b, 1H), 9.93(s, 1H), 8.19(d, 3.2Hz, 1H), 7.67(d, 7.6Hz, 1H), 7.57(d, 7.2Hz, 2H), 7.42(t, 7.4Hz, 2H), 7.35(d, 7.2Hz, 1H), 7.12(t, 8.0Hz, 1H), 6.93(d, 8.0Hz, 1H), 5.29(s, 2H)

<sup>13</sup>C-NMR (DMSO-*d*<sub>6</sub>, 100MHz): 185.12, 145.26, 137.81, 137.03, 128.43, 127.90, 127.68, 127.18, 125.83, 122.95, 118.68, 113.57, 105.54, 69.38

**3i<sup>1</sup>**

<sup>1</sup>H-NMR (DMSO-*d*<sub>6</sub>, 400MHz): 12.6(b, 1H), 10.00(s, 1H), 8.55(d, 3.2Hz, 1H), 8.24(d, 8.0Hz, 1H), 8.04(s, 1H), 7.59(dd, 1.4Hz, 8.2Hz, 1H)

<sup>13</sup>C-NMR (DMSO-*d*<sub>6</sub>, 100MHz): 185.44, 141.30, 135.95, 127.38, 125.08, 121.74, 119.81, 118.04, 117.43, 105.13

**3j<sup>1</sup>**

<sup>1</sup>H-NMR (DMSO-*d*<sub>6</sub>, 400MHz): 12.0(b, 1H), 9.89(s, 1H), 8.21(d, 3.2Hz, 1H), 7.58(d, 2.8Hz, 1H), 7.40(d, 8.8Hz, 1H), 6.88(dd, 2.4Hz, 8.8Hz, 1H), 3.78(s, 3H)

<sup>13</sup>C-NMR (DMSO-*d*<sub>6</sub>, 100MHz): 184.78, 155.59, 138.38, 131.76, 124.86, 118.00, 113.26, 113.15, 102.45, 55.23

**3k<sup>1</sup>**

<sup>1</sup>H-NMR (DMSO-*d*<sub>6</sub>, 400MHz): 12.4(b, 1H), 9.98(s, 1H), 8.50(d, 3.2Hz, 1H), 8.18(d, 8.4Hz, 1H), 8.14(s, 1H), 7.83(d, 8.4Hz, 1H), 3.87(s, 3H)

<sup>13</sup>C-NMR (DMSO-*d*<sub>6</sub>, 100MHz): 185.25, 166.64, 140.94, 136.47, 127.76, 124.53, 122.77, 120.68, 118.04, 114.18, 52.06

**3l<sup>1</sup>**

<sup>1</sup>H-NMR (CD<sub>3</sub>OD, 400MHz): 9.86(s, 1H), 8.06(s, 1H), 7.98(d, 7.6Hz, 1H), 7.13(t, 7.4Hz, 1H), 7.06(d, 7.2Hz, 1H), 2.51(s, 3H)

<sup>13</sup>C-NMR (CD<sub>3</sub>OD, 100MHz): 187.63, 139.57, 138.43, 125.71, 125.60, 123.99, 123.05, 120.57, 120.13, 16.90

<sup>1</sup>H-NMR (DMSO-*d*<sub>6</sub>, 400MHz): 12.2(b, 1H), 9.95(s, 1H), 8.29(d, 3.2Hz, 1H), 7.93(d, 7.6Hz, 1H), 7.13(t, 7.6Hz, 1H), 7.06(d, 7.2Hz, 1H), 2.50(s, 3H)

<sup>13</sup>C-NMR (DMSO-*d*<sub>6</sub>, 100MHz): 185.01, 138.17, 136.55, 124.01, 123.92, 122.32, 121.75, 118.56, 118.38, 16.67

**3m<sup>1</sup>**

<sup>1</sup>H-NMR (DMSO-*d*<sub>6</sub>, 400MHz): 12.3(b, 1H), 9.93(s, 1H), 8.34(d, 3.2Hz, 1H), 8.22(d, 1.6Hz, 1H), 7.49(d, 8.4Hz, 1H), 7.39(dd, 2.0Hz, 8.8Hz, 1H)

<sup>13</sup>C-NMR (DMSO-*d*<sub>6</sub>, 100MHz): 185.13, 139.23, 135.74, 126.04, 125.89, 122.91, 117.43, 114.80, 114.55

**3n<sup>5</sup>**

<sup>1</sup>H-NMR (CDCl<sub>3</sub>, 400MHz): 9.99(s, 1H), 8.33(d, 6.4Hz, 1H), 7.66(s, 1H), 7.37(s, 3H), 3.86(s, 3H)

<sup>13</sup>C-NMR (CDCl<sub>3</sub>, 100MHz): 184.48, 139.35, 137.91, 125.28, 124.04, 122.95, 122.02, 118.05, 109.90, 33.68

**3o<sup>6</sup>**

<sup>1</sup>H-NMR (DMSO-*d*<sub>6</sub>, 400MHz): 9.94(s, 1H), 8.48(s, 1H), 8.12(d, 6.8Hz, 1H), 7.59(d, 8.0Hz, 1H), 7.34-7.26(m, 7H), 5.55(s, 2H)

<sup>13</sup>C-NMR (DMSO-*d*<sub>6</sub>, 100MHz): 184.68, 140.97, 136.94, 136.75, 128.71, 127.77, 127.33, 124.78, 123.60, 122.54, 121.06, 117.38, 111.39, 49.78

**3p<sup>7</sup>**

<sup>1</sup>H-NMR (DMSO-*d*<sub>6</sub>, 400MHz): 10.0(s, 1H), 8.61(s, 1H), 8.24-8.20(m, 1H), 7.70-7.63(m, 4H), 7.56-7.54(m, 2H), 7.37-7.34(m, 2H)

<sup>13</sup>C-NMR (DMSO-*d*<sub>6</sub>, 100MHz): 185.29, 140.57, 137.61, 136.74, 130.04, 128.15, 124.97, 124.70, 124.49, 123.23, 121.39, 118.80, 111.32



**3q<sup>8</sup>**

<sup>1</sup>H-NMR (CDCl<sub>3</sub>, 400MHz): 10.1(s, 1H), 8.34-8.32(m, 2H), 7.95(s, 1H), 7.80-7.78(m, 2H), 7.70(t, 7.4Hz, 1H), 7.60(t, 7.6Hz, 2H), 7.50-7.45(m, 2H)

<sup>13</sup>C-NMR (CDCl<sub>3</sub>, 100MHz): 185.69, 168.50, 137.59, 136.81, 132.99, 129.44, 129.01, 126.59, 126.24, 125.58, 122.18, 122.04, 116.08

**4<sup>9</sup>**

<sup>1</sup>H-NMR (CDCl<sub>3</sub>, 400MHz): 7.06 (d, 8.4Hz, 2H), 6.71(d, 5.6Hz, 2H), 3.81(s, 2H), 2.91(s, 12H)

<sup>13</sup>C-NMR (CDCl<sub>3</sub>, 100MHz): 129.41, 113.12, 40.97, 39.88

**6. <sup>1</sup>H and <sup>13</sup>C NMR charts of the products**

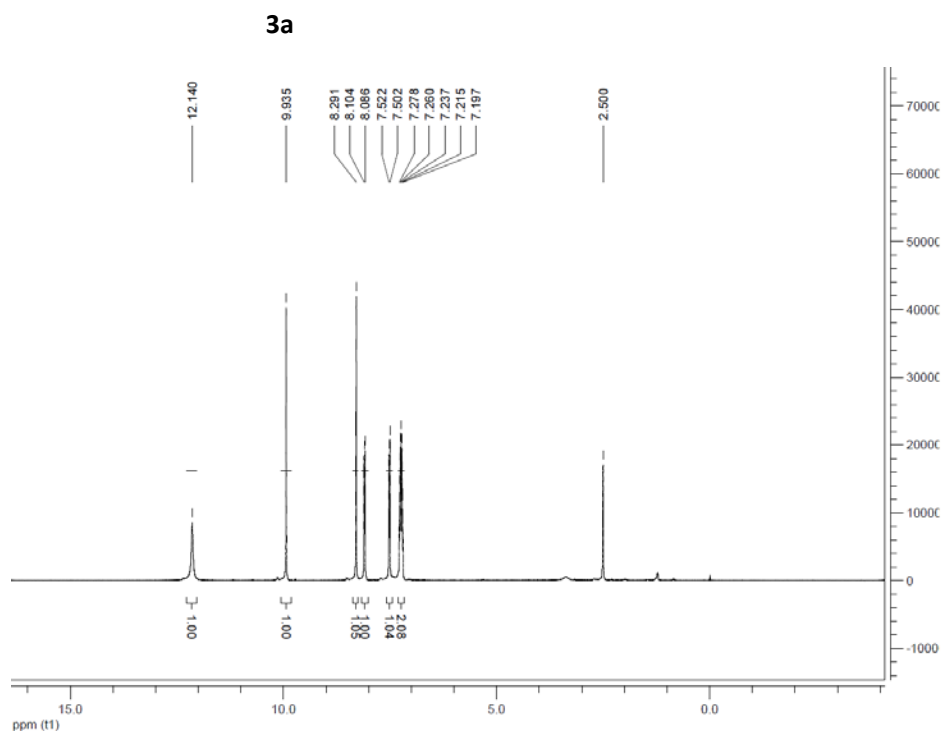

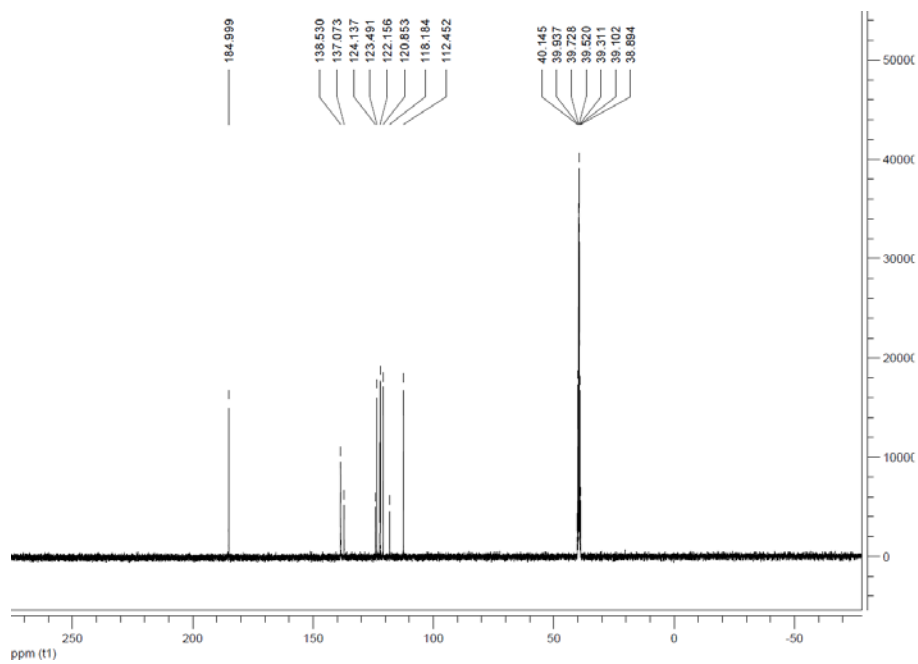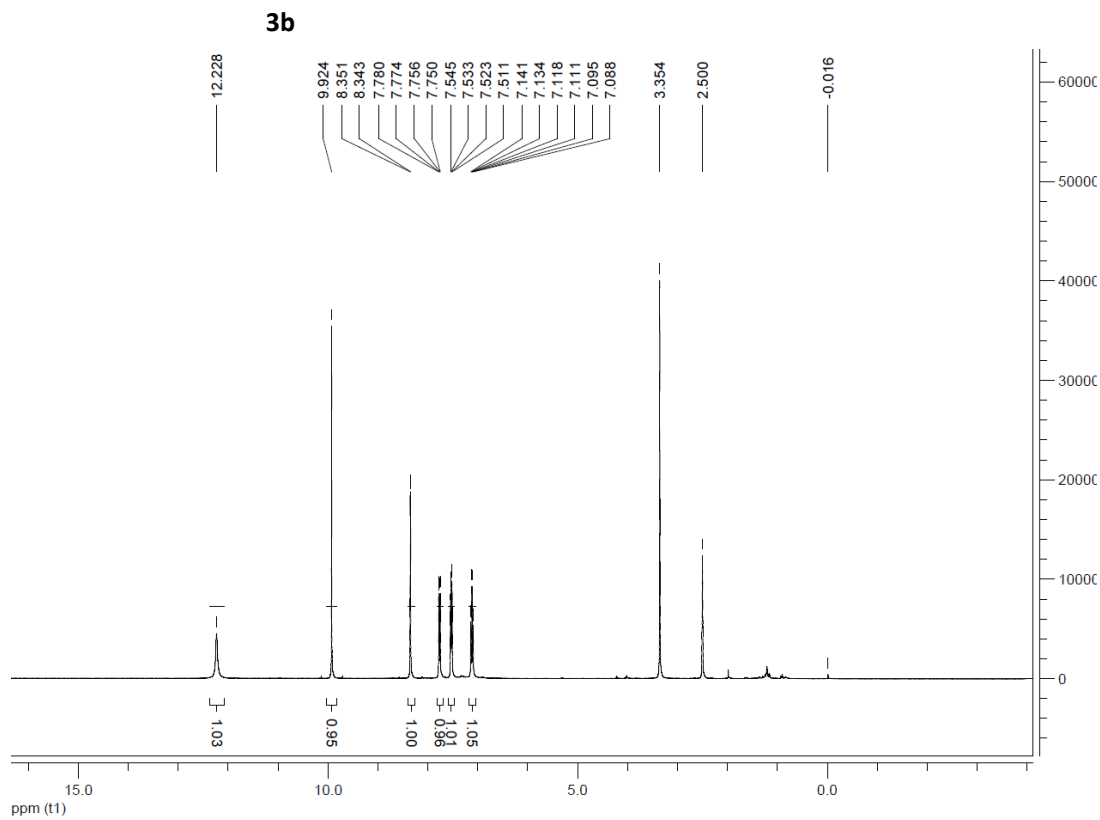

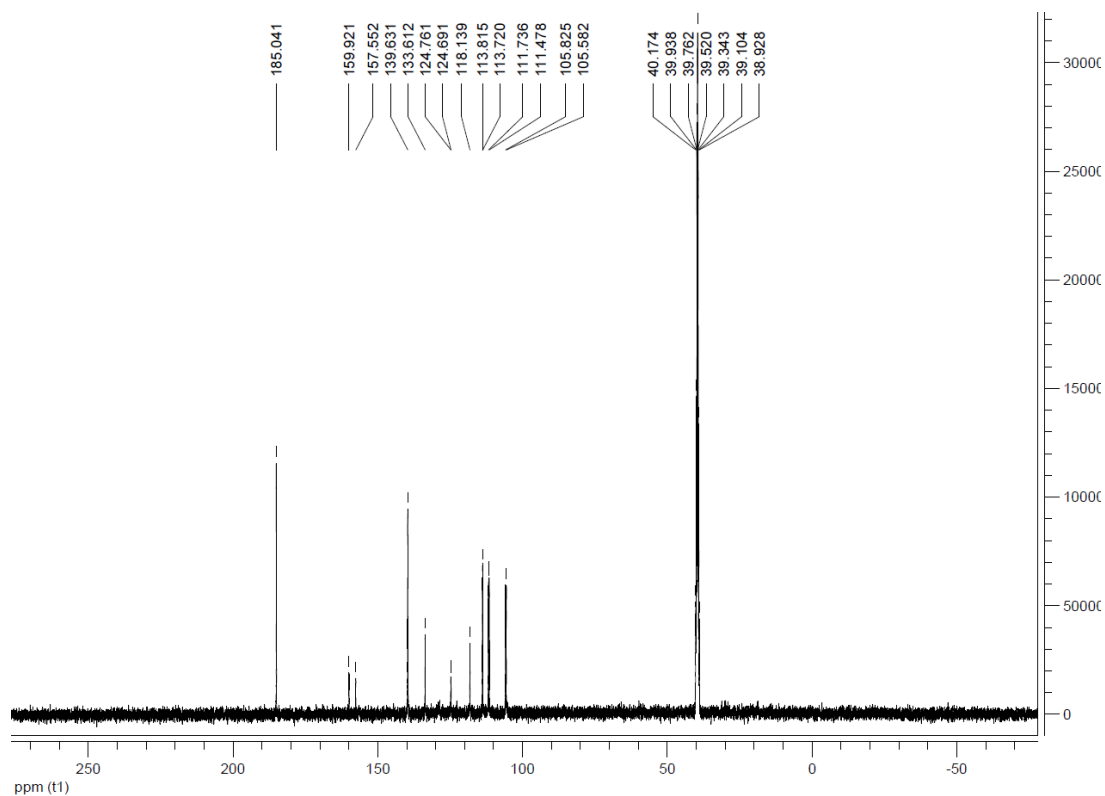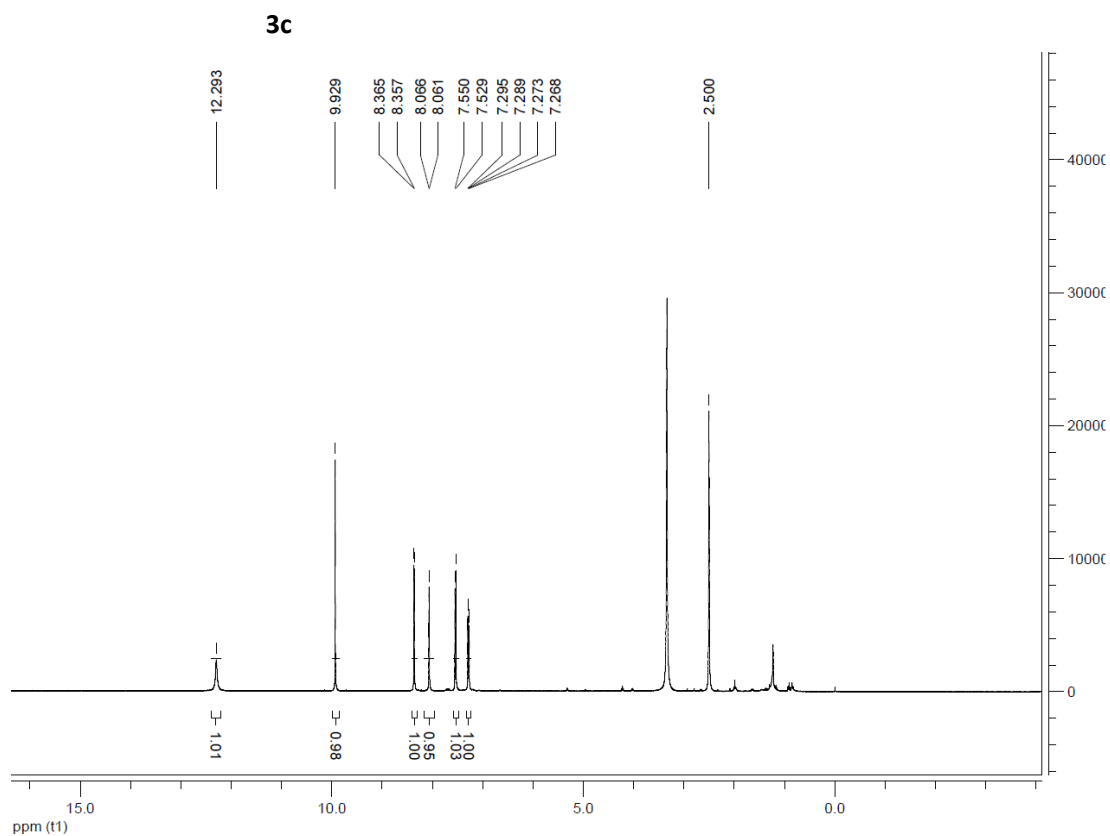

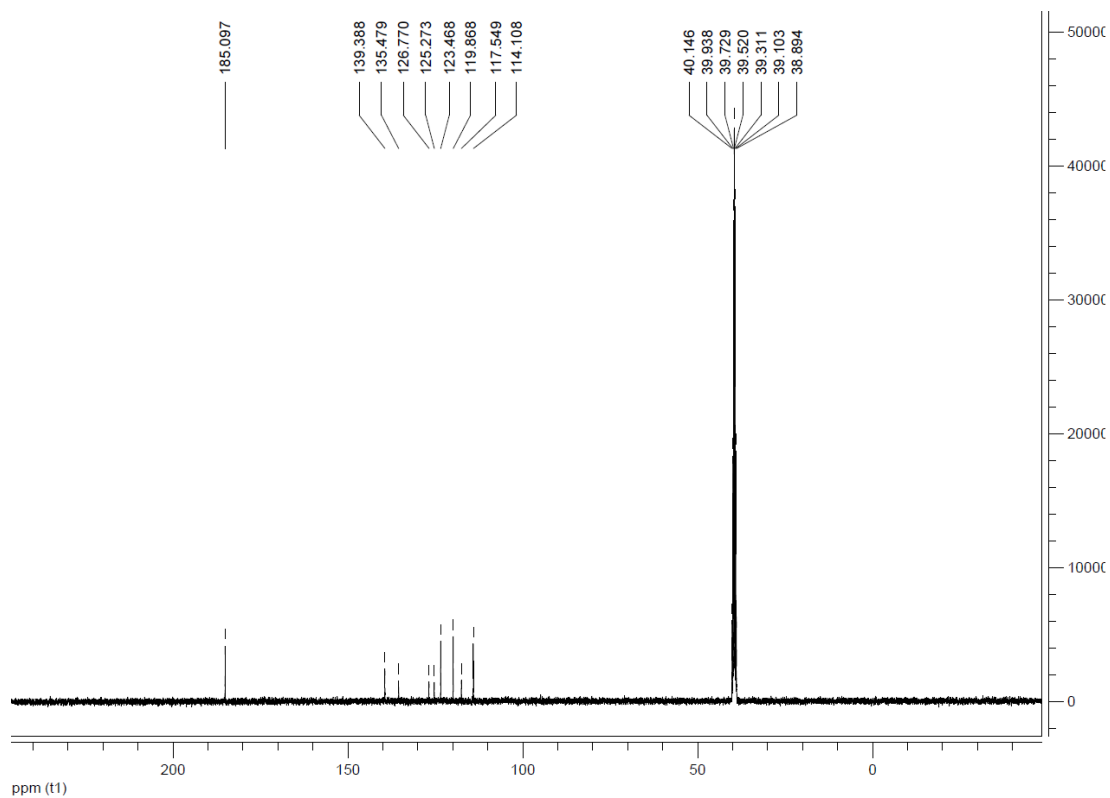

**3d in methanol-*d*<sub>4</sub>**

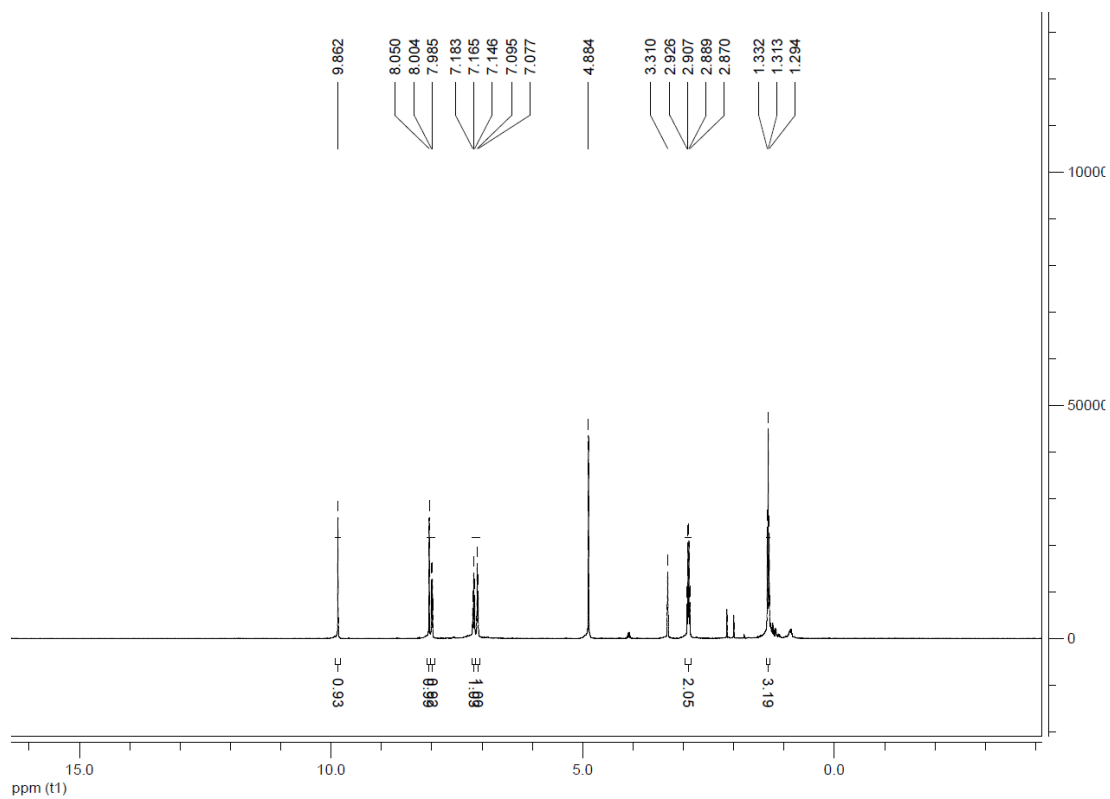

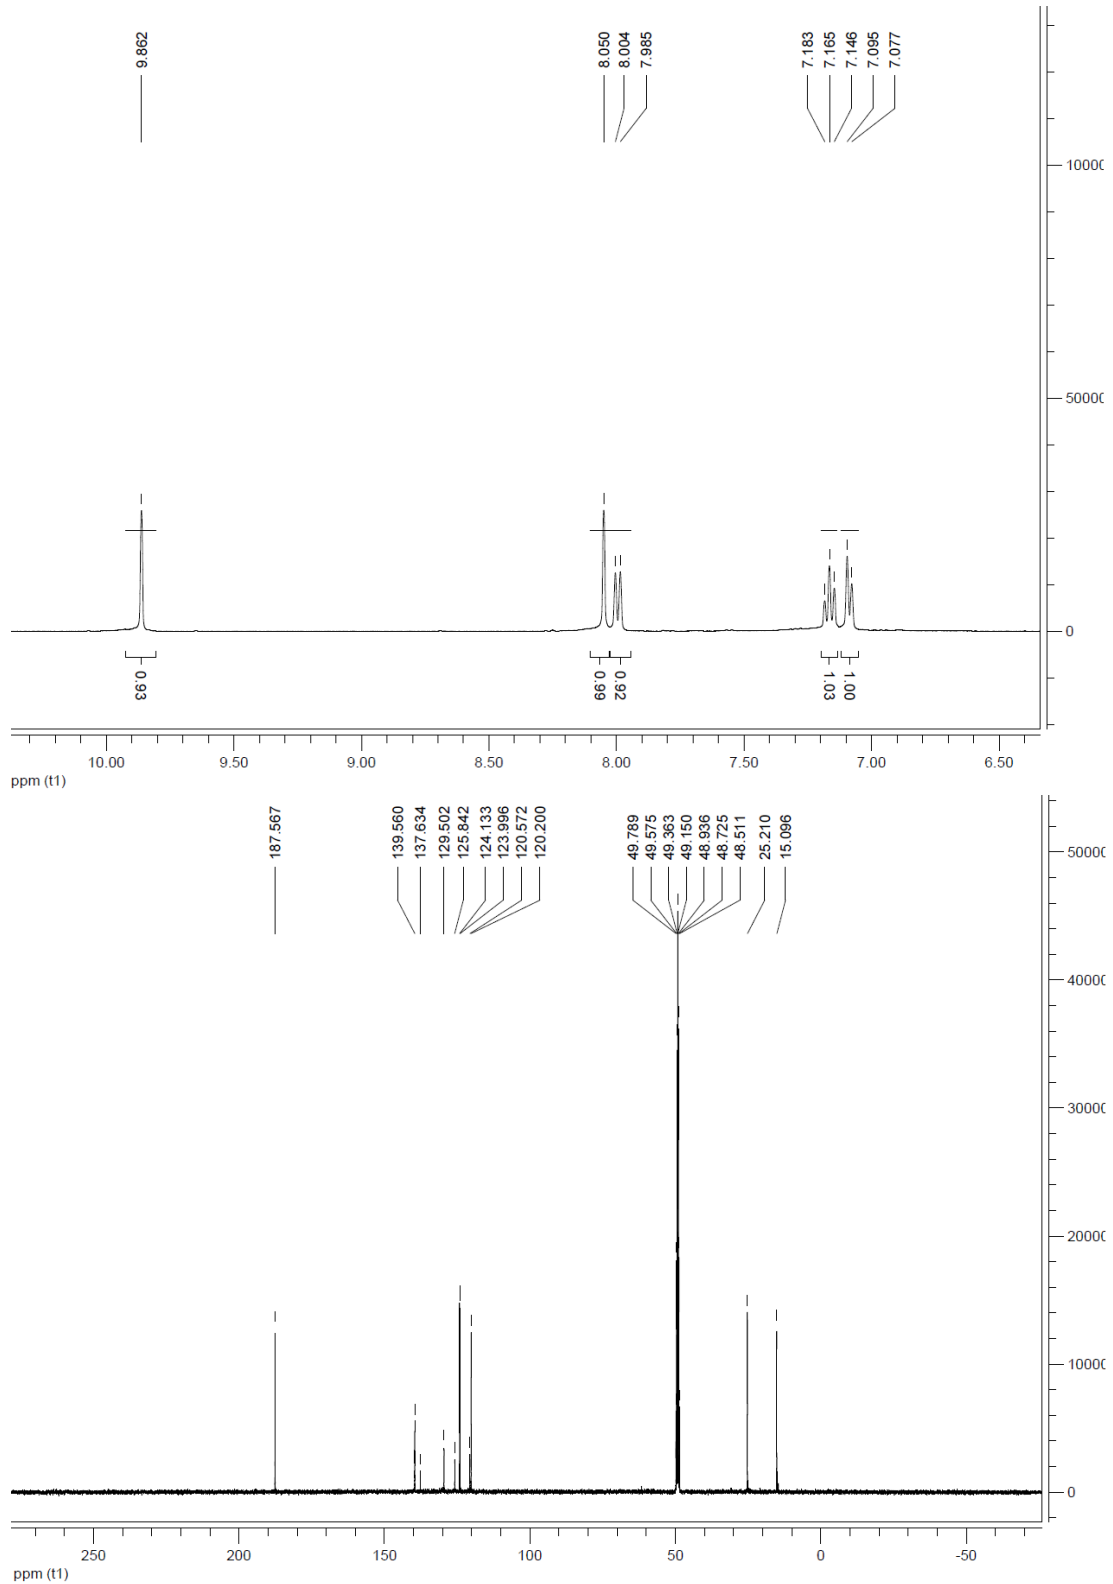

**3d** in DMSO-*d*<sub>6</sub>

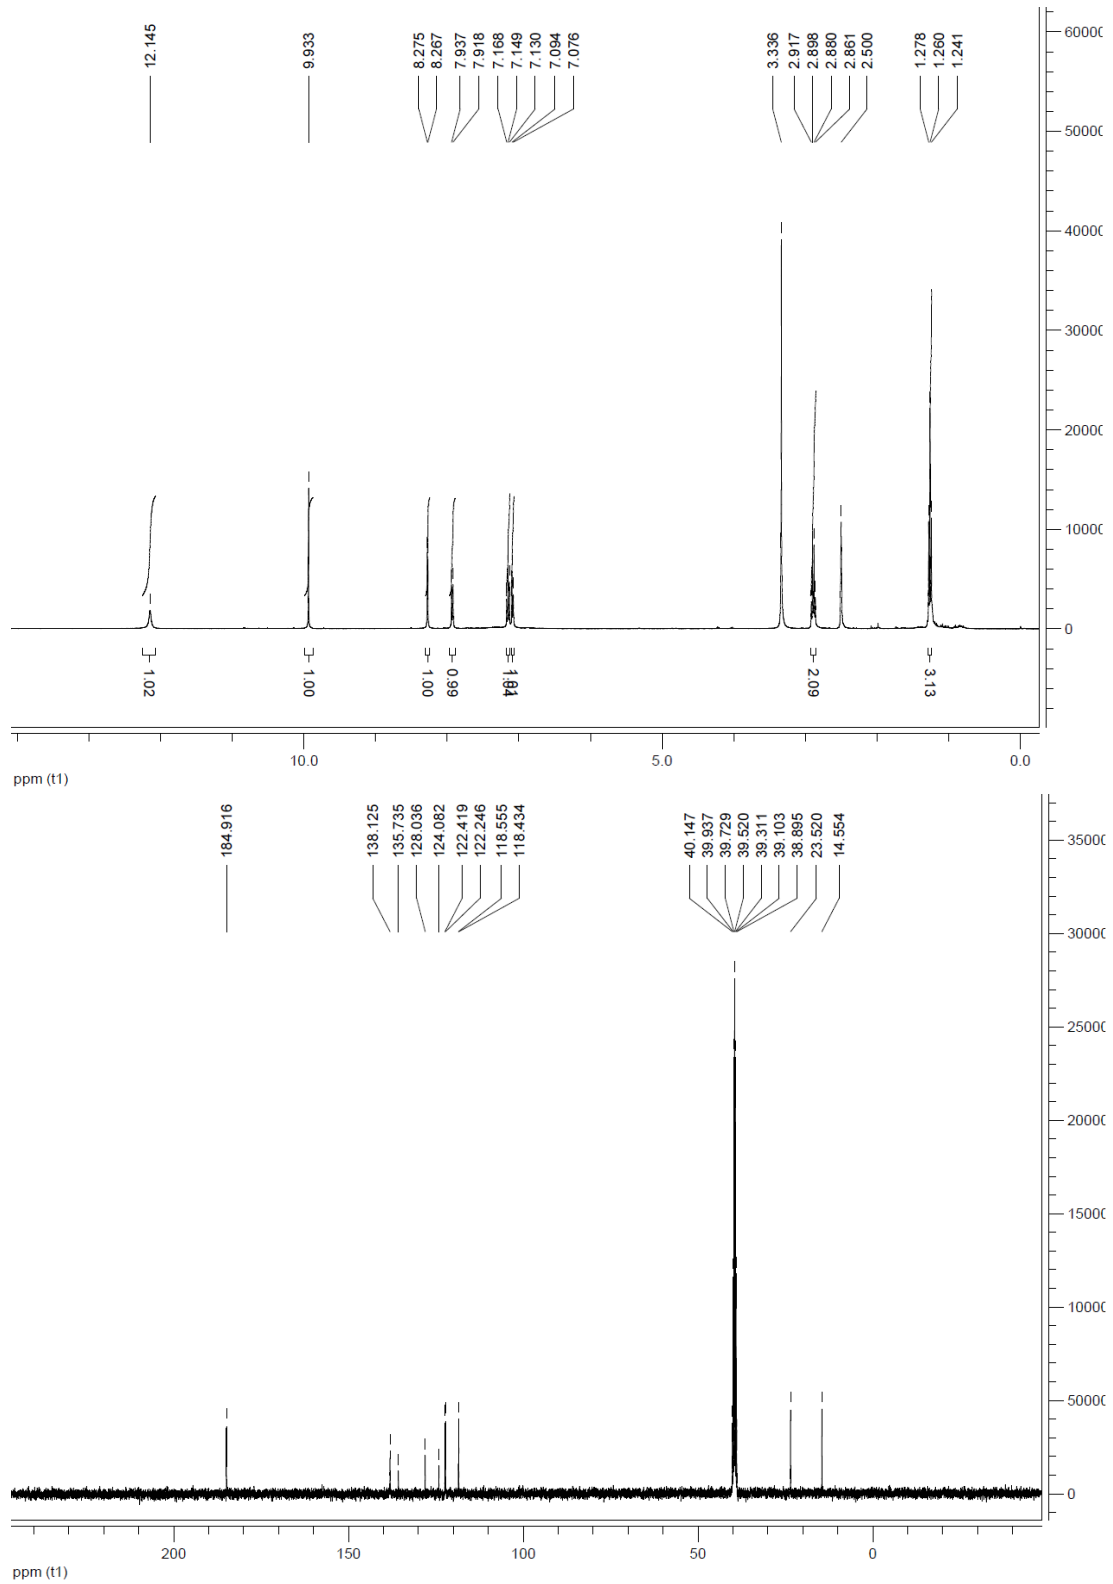

**3e**

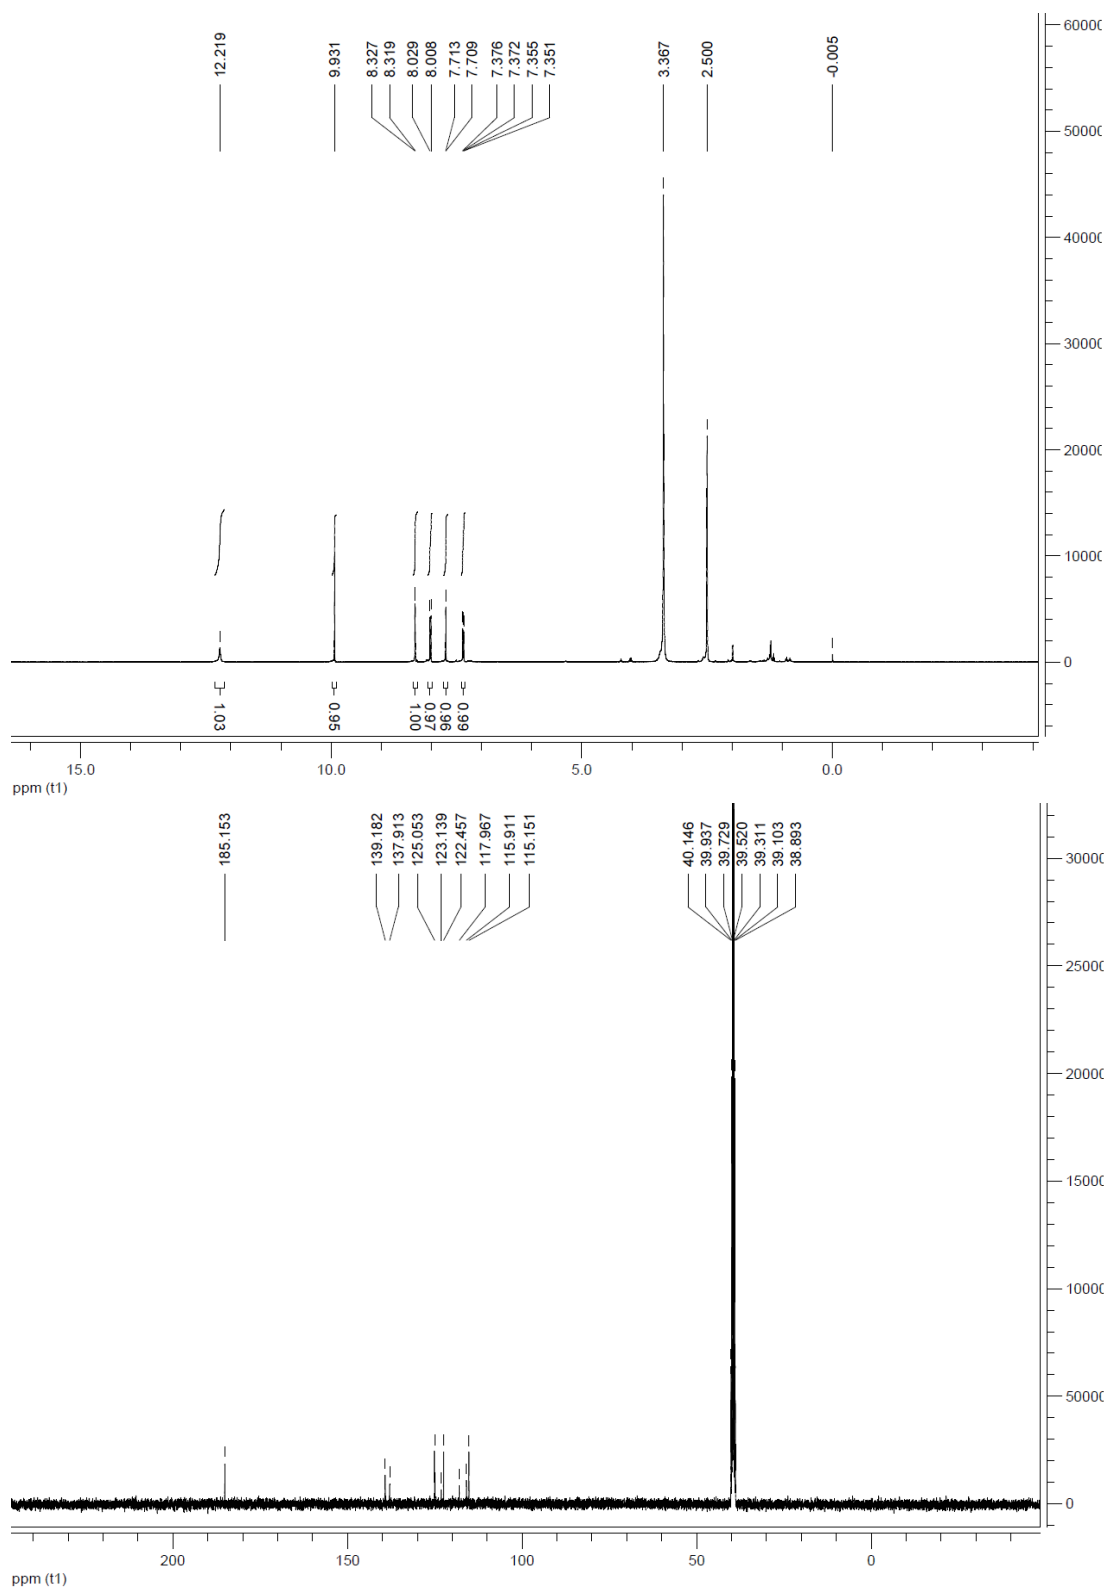

**3f**





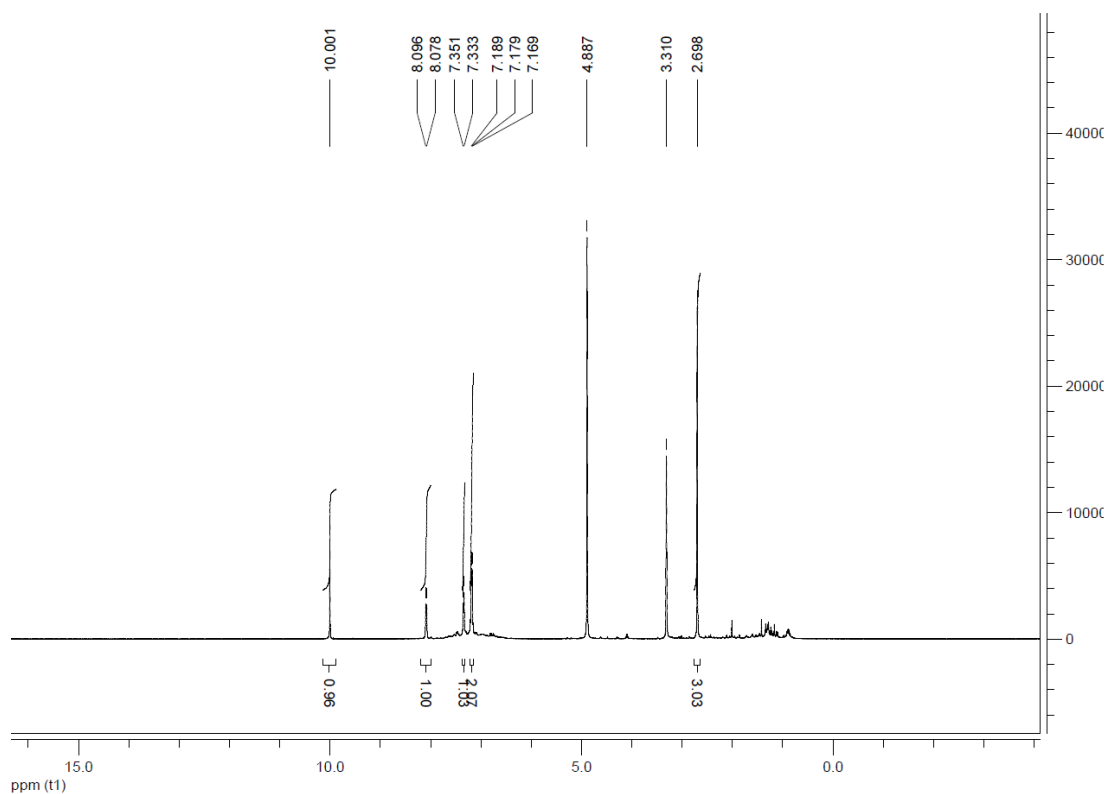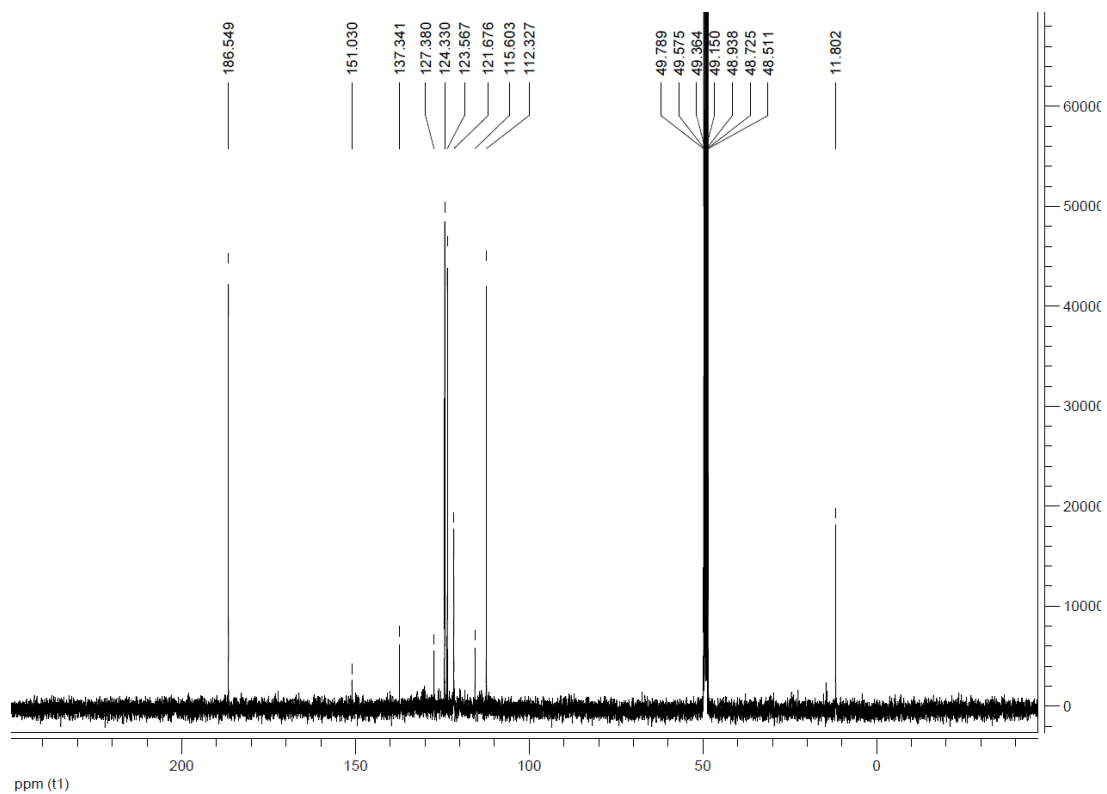

3h

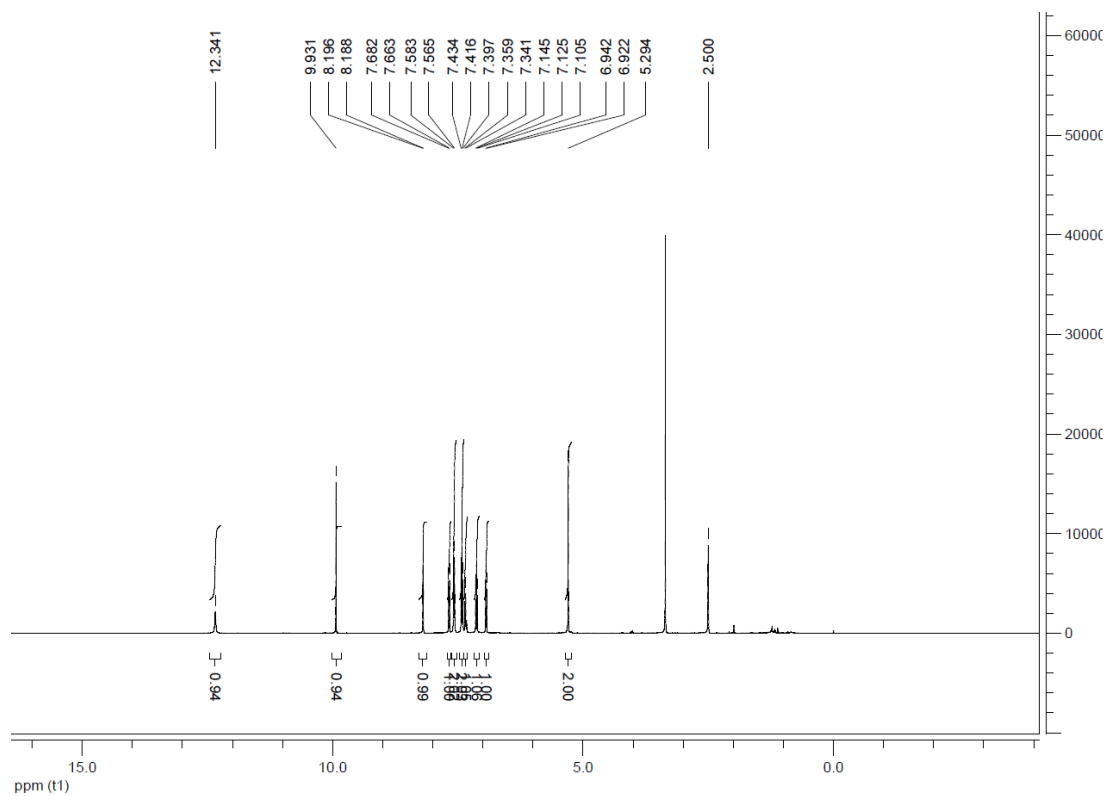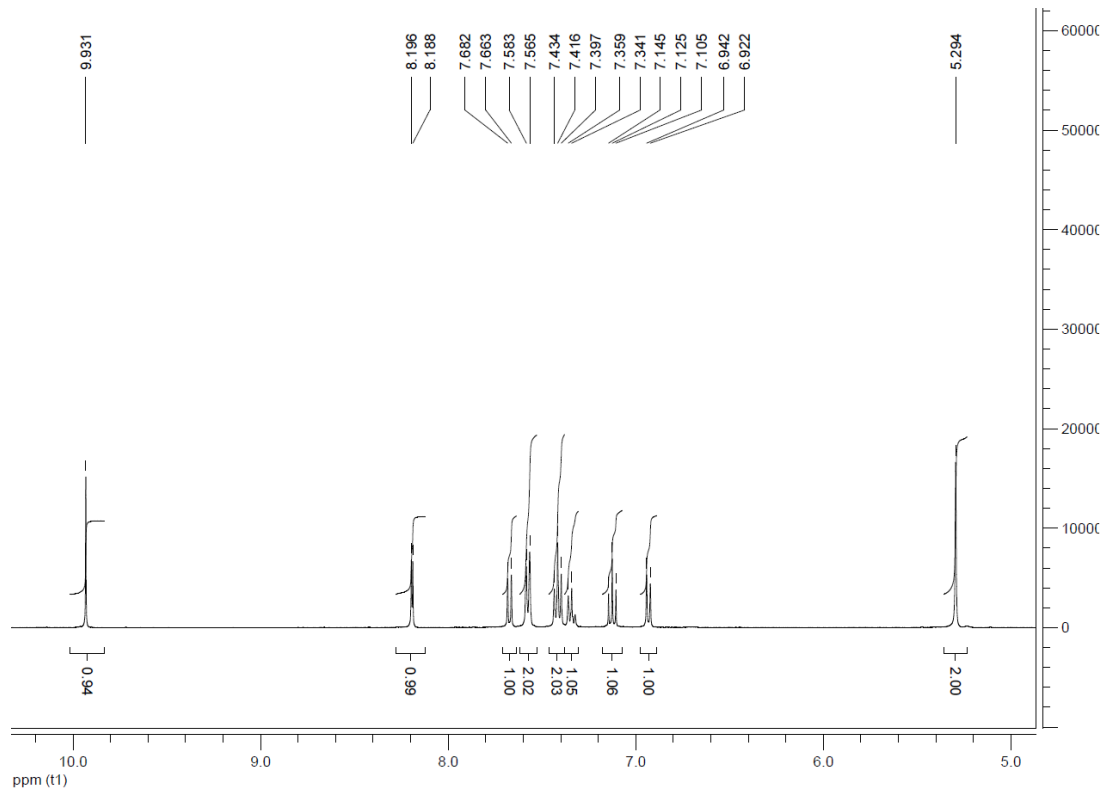

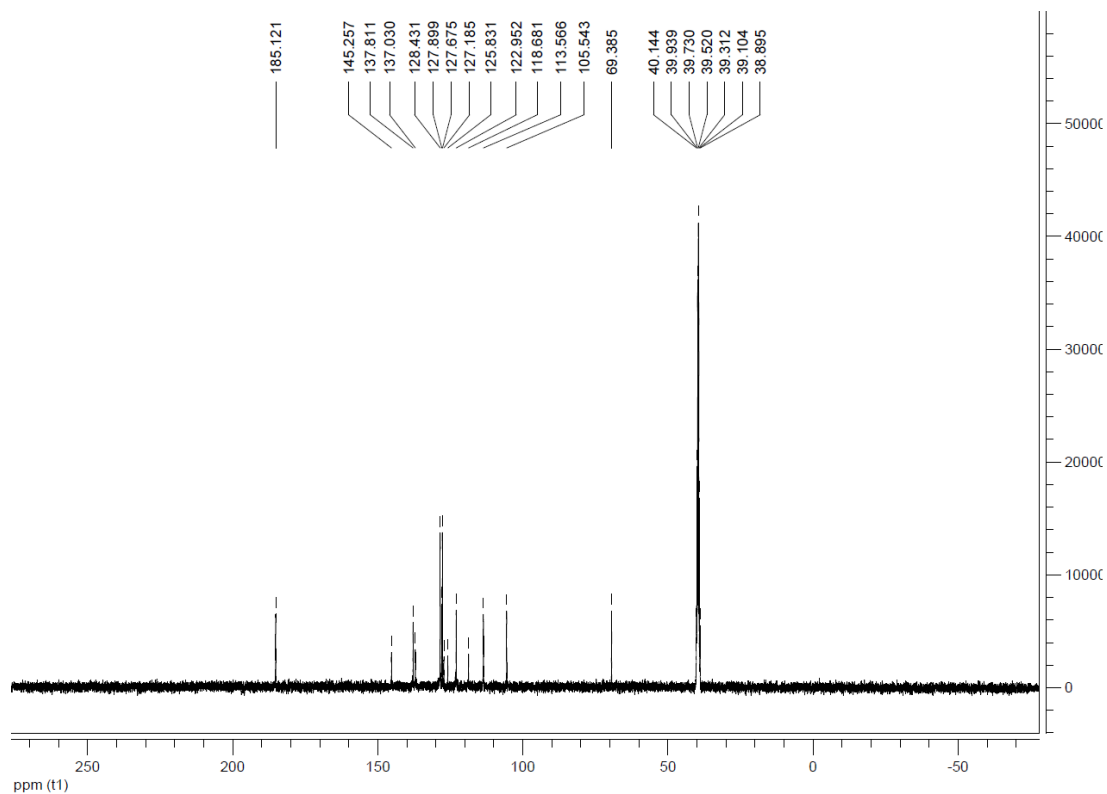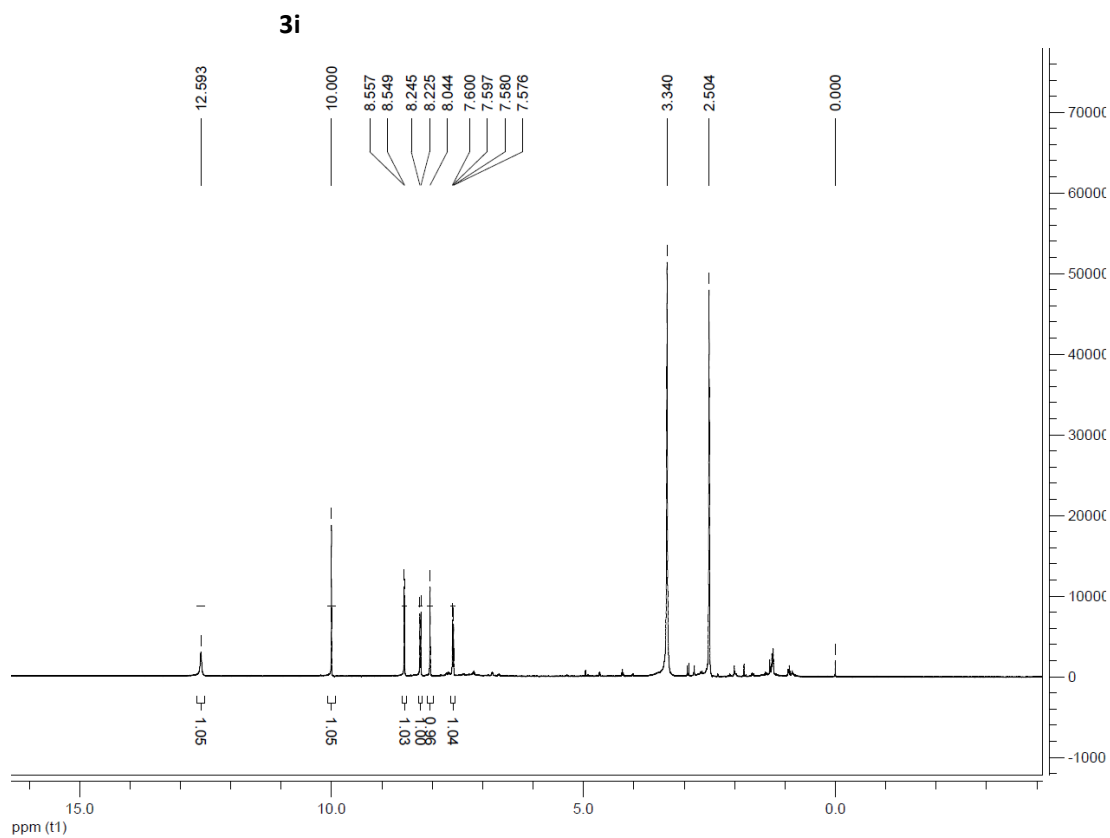

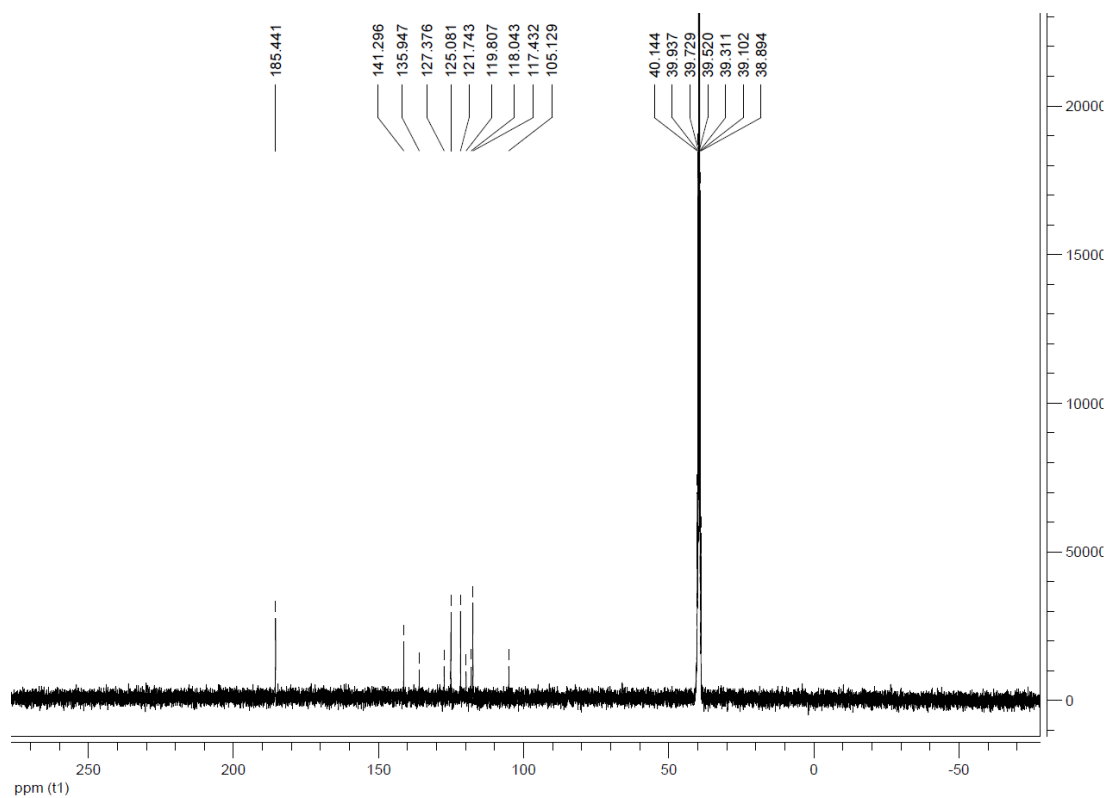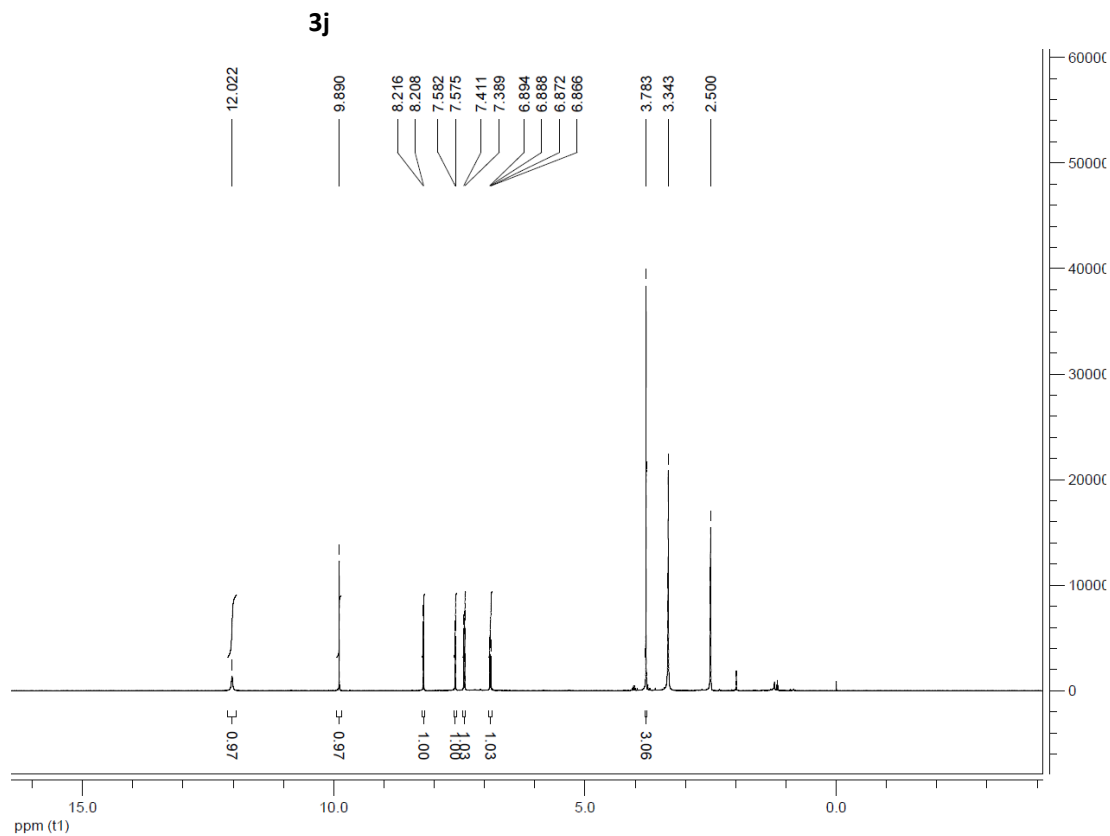

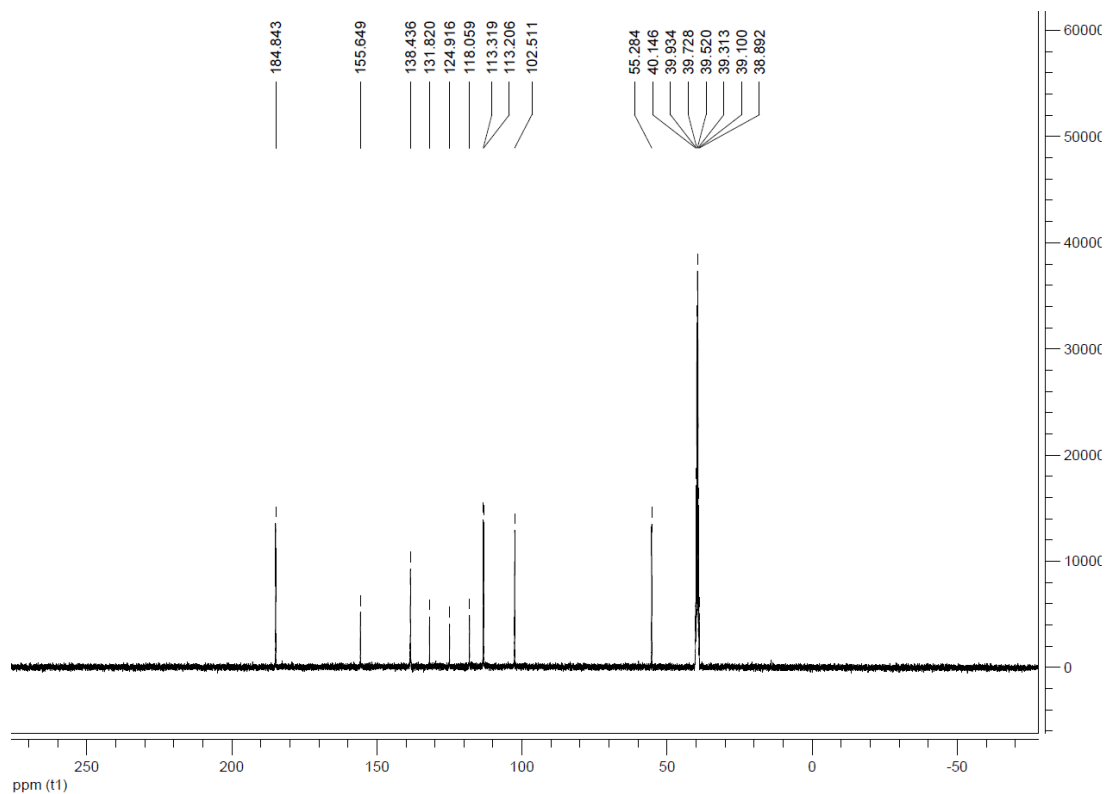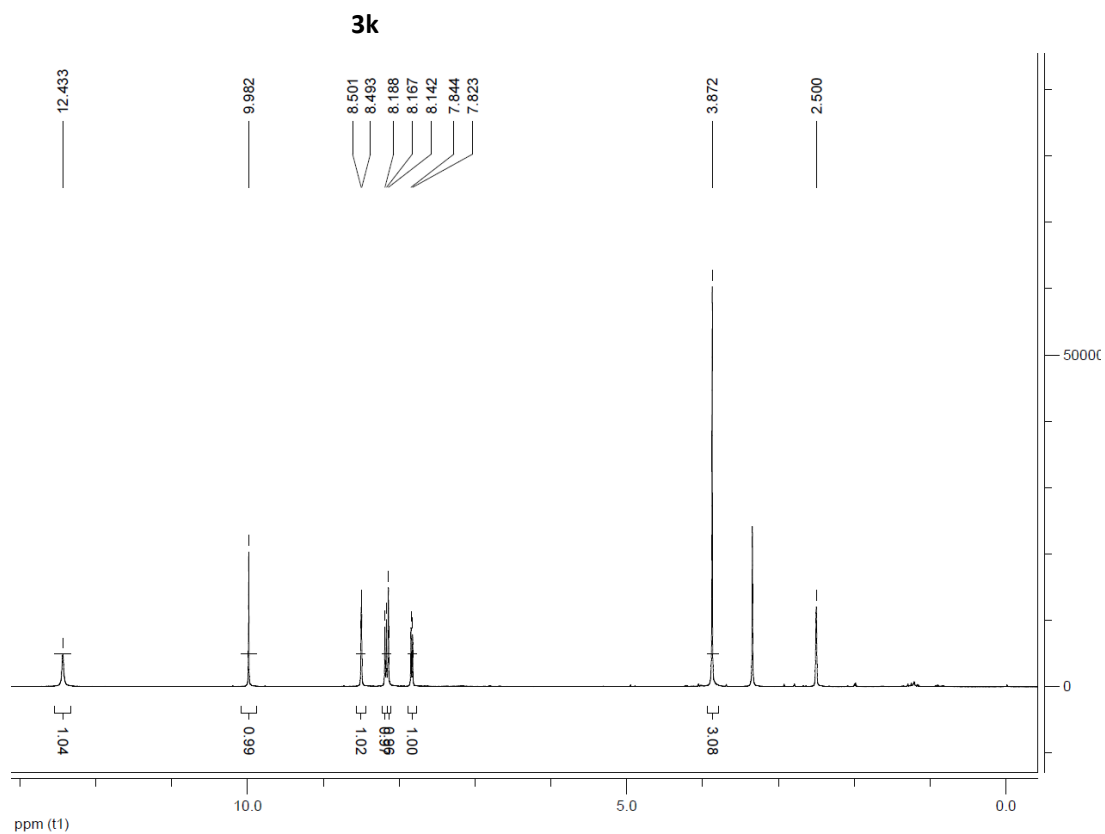

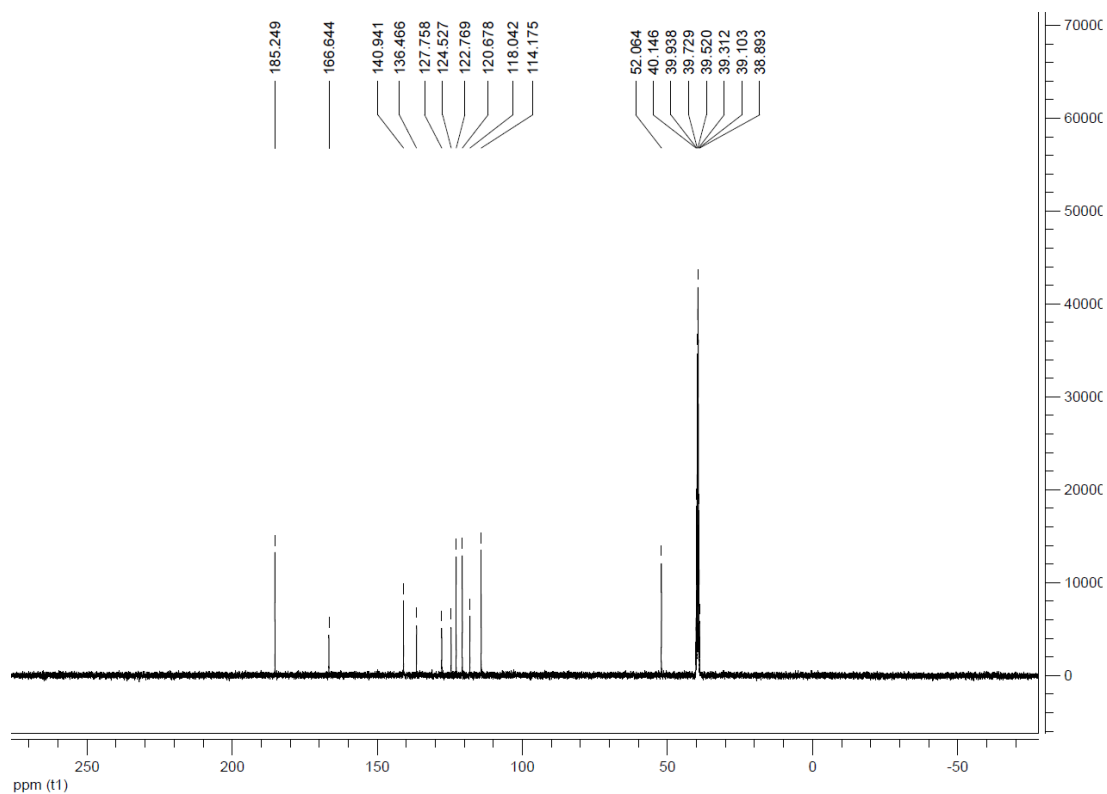

**31 in methanol-*d*<sub>4</sub>**

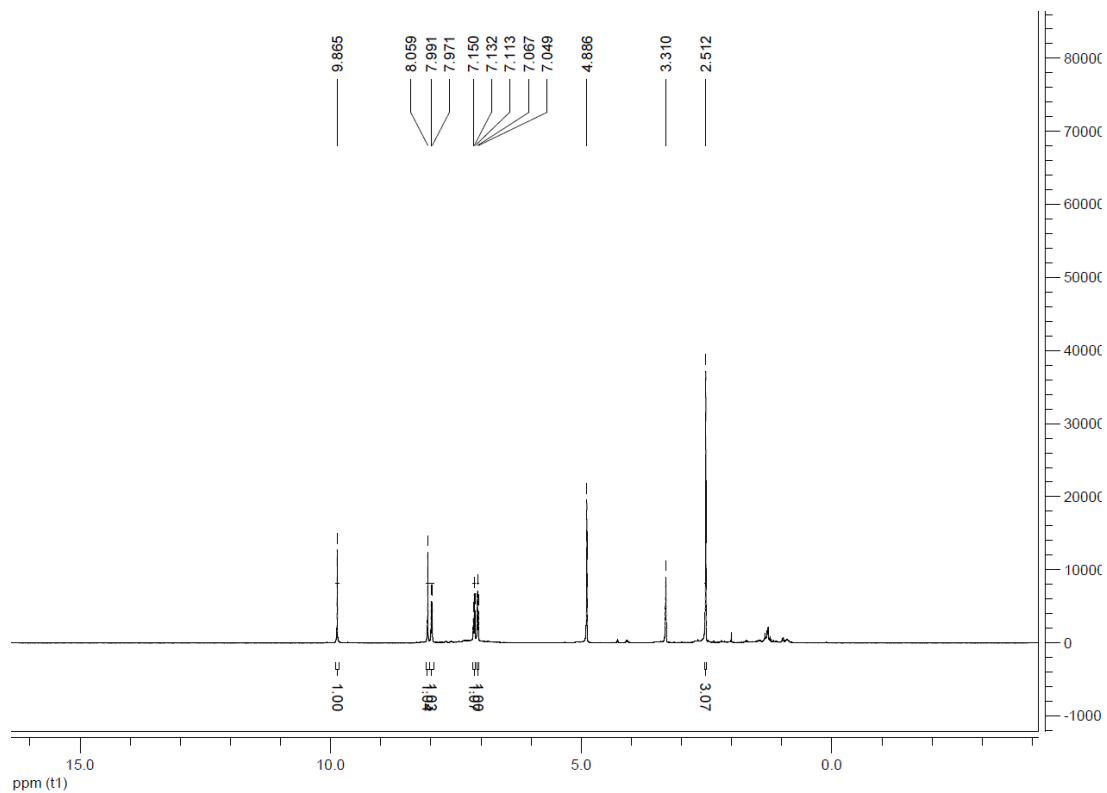

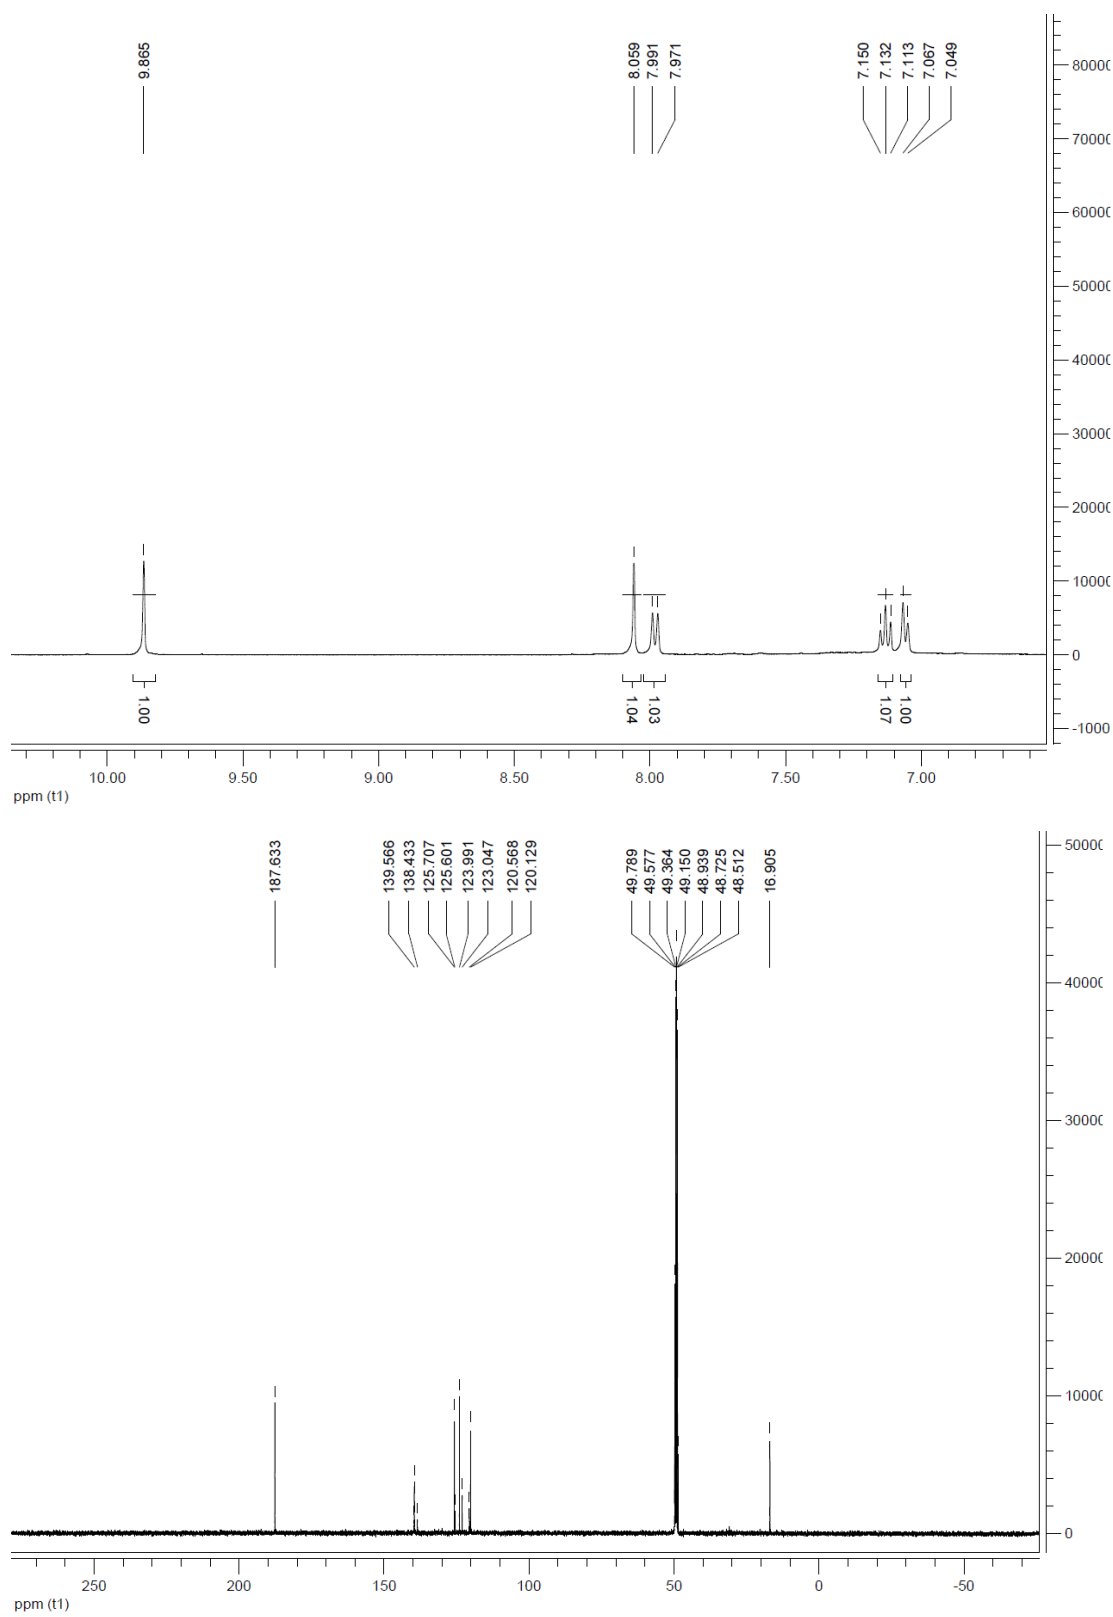

**3I** in DMSO-*d*<sub>6</sub>





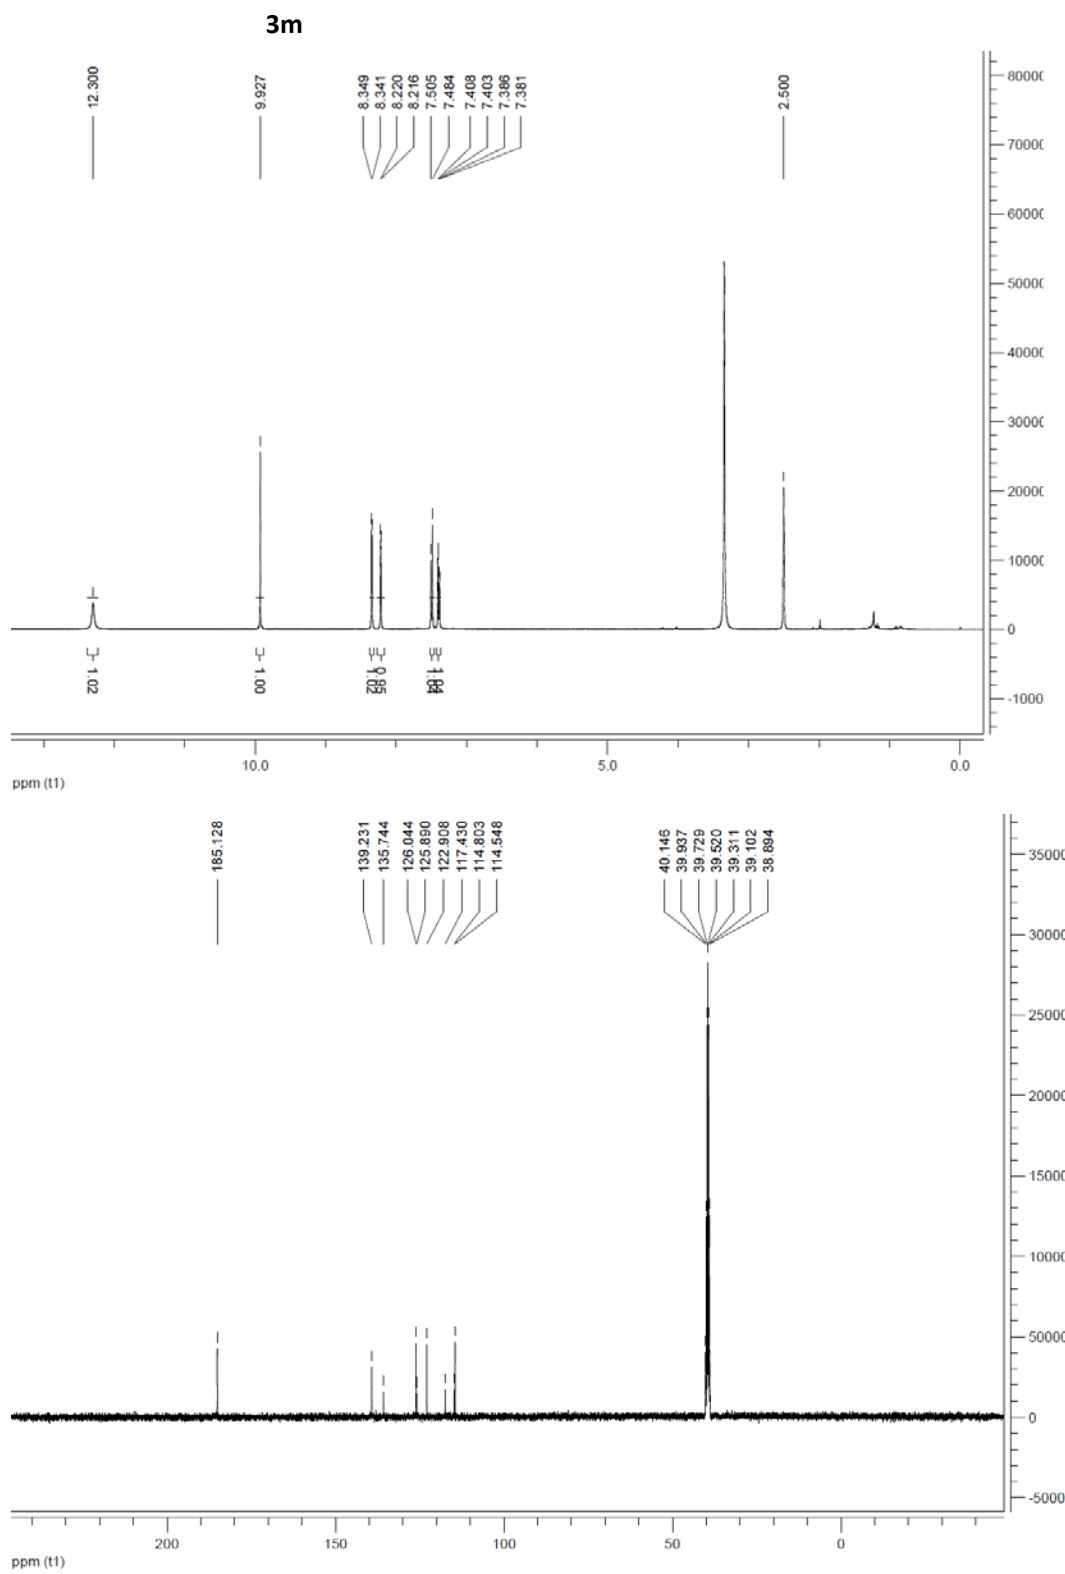

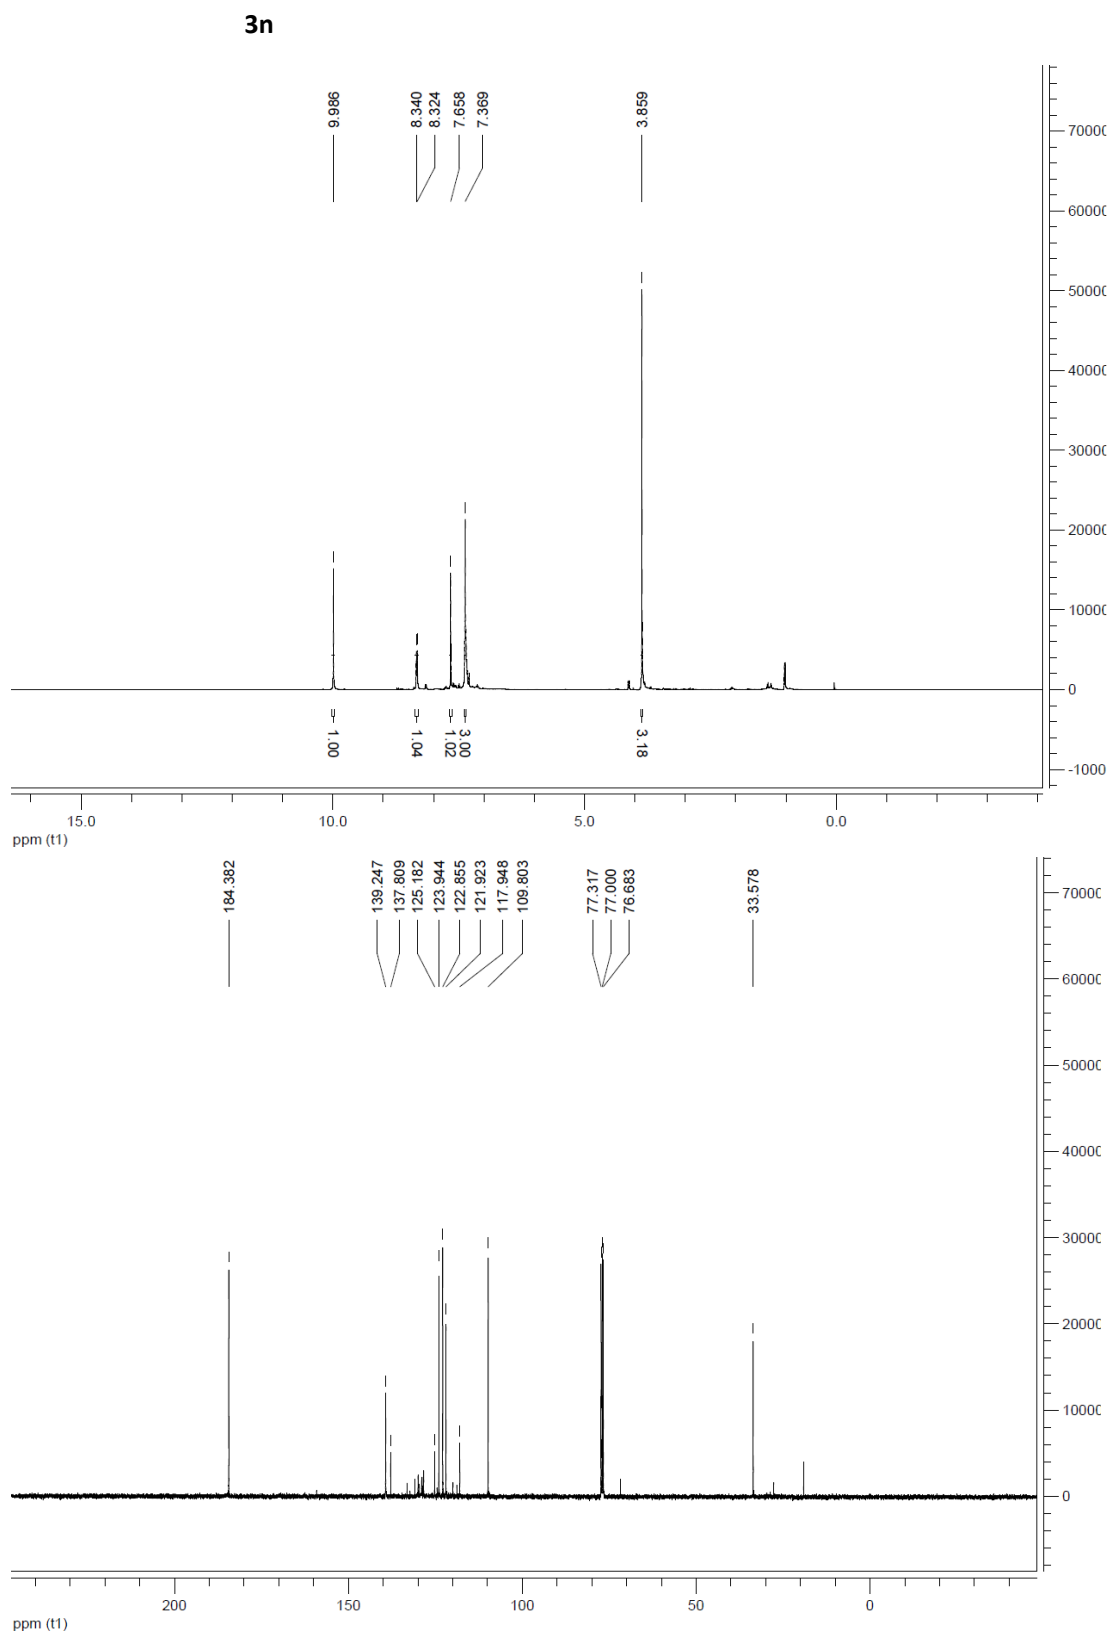

30

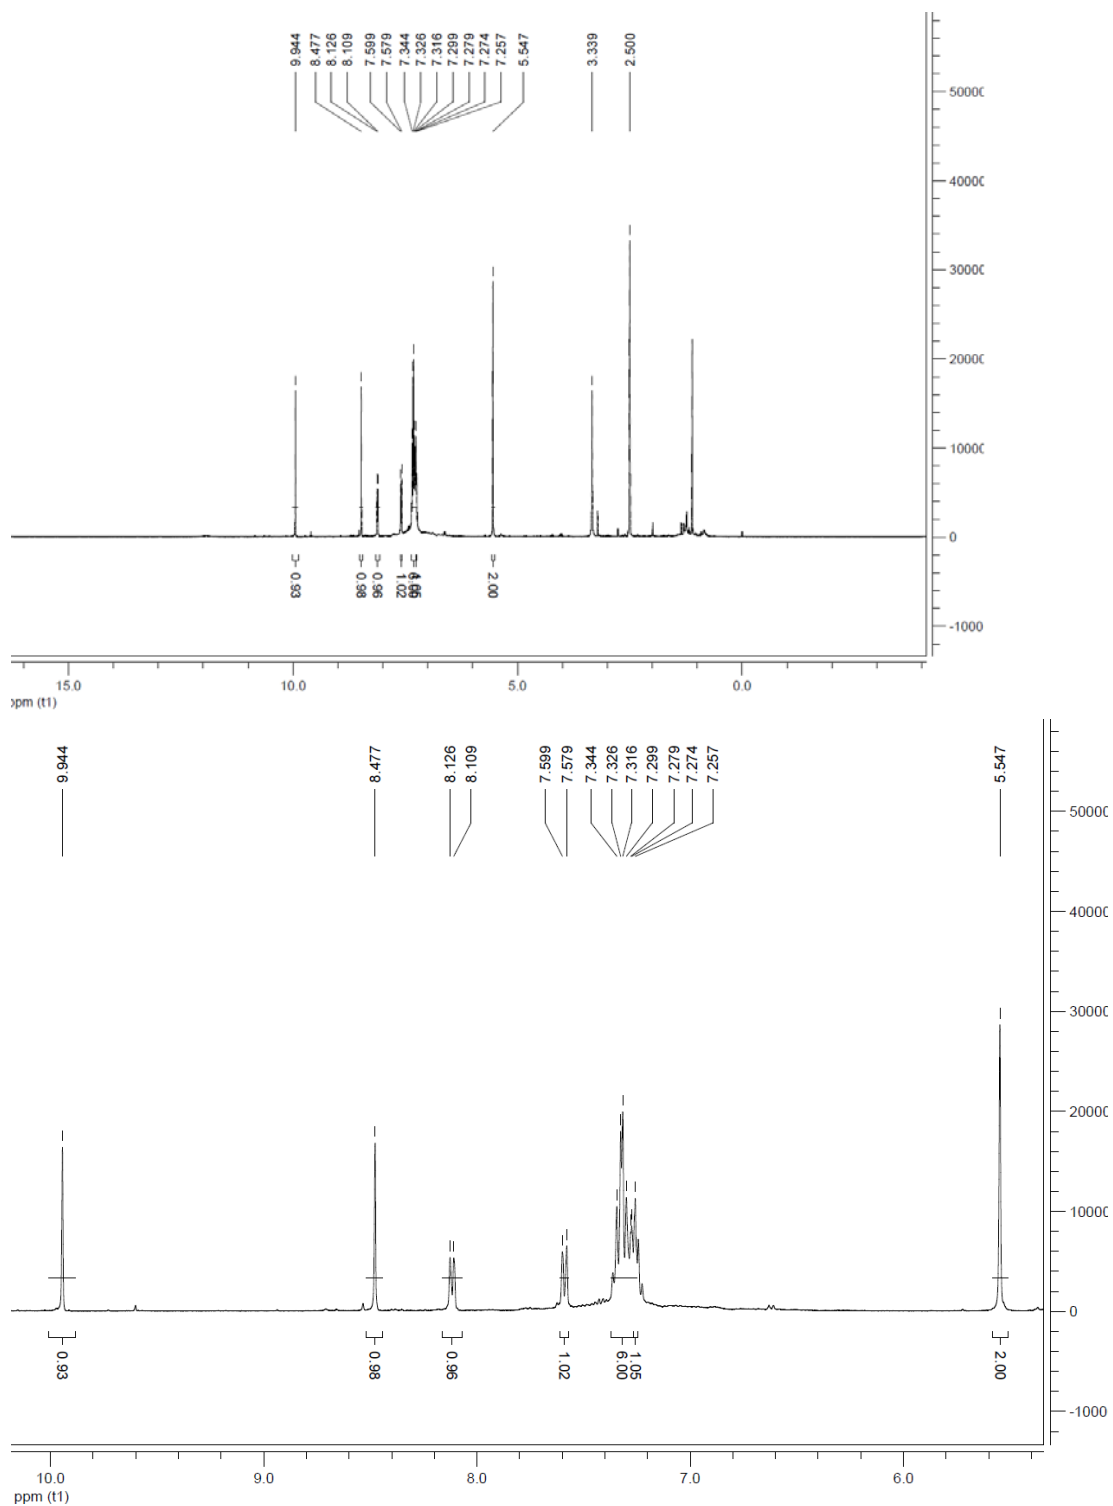

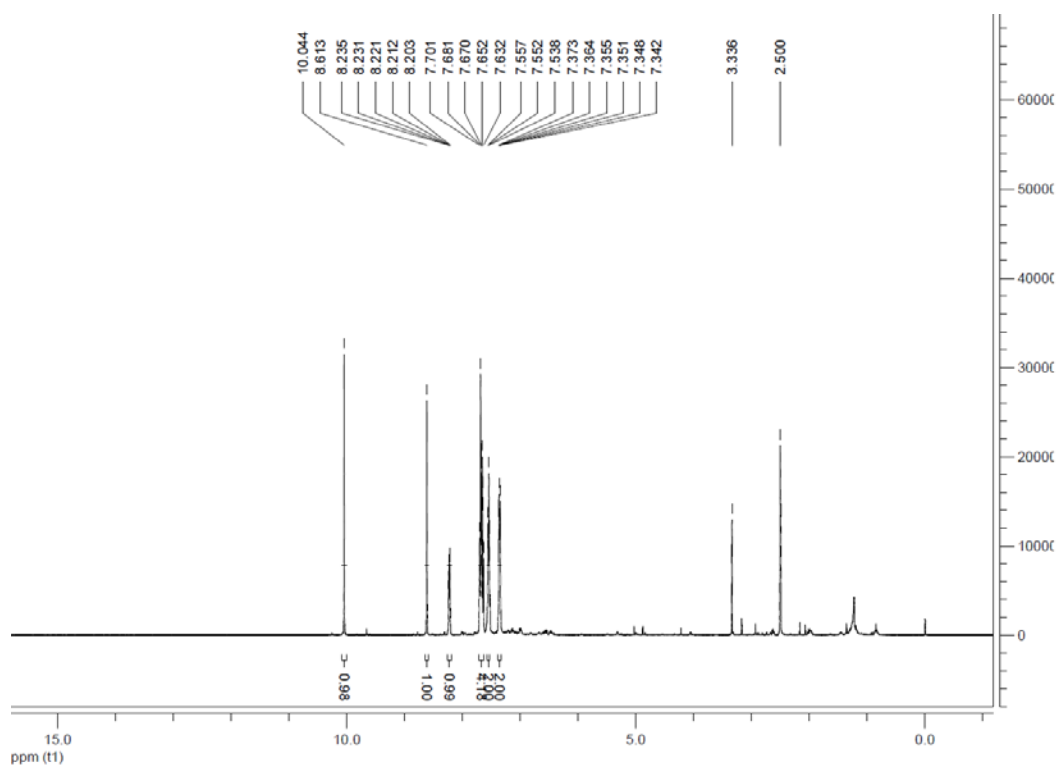

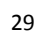

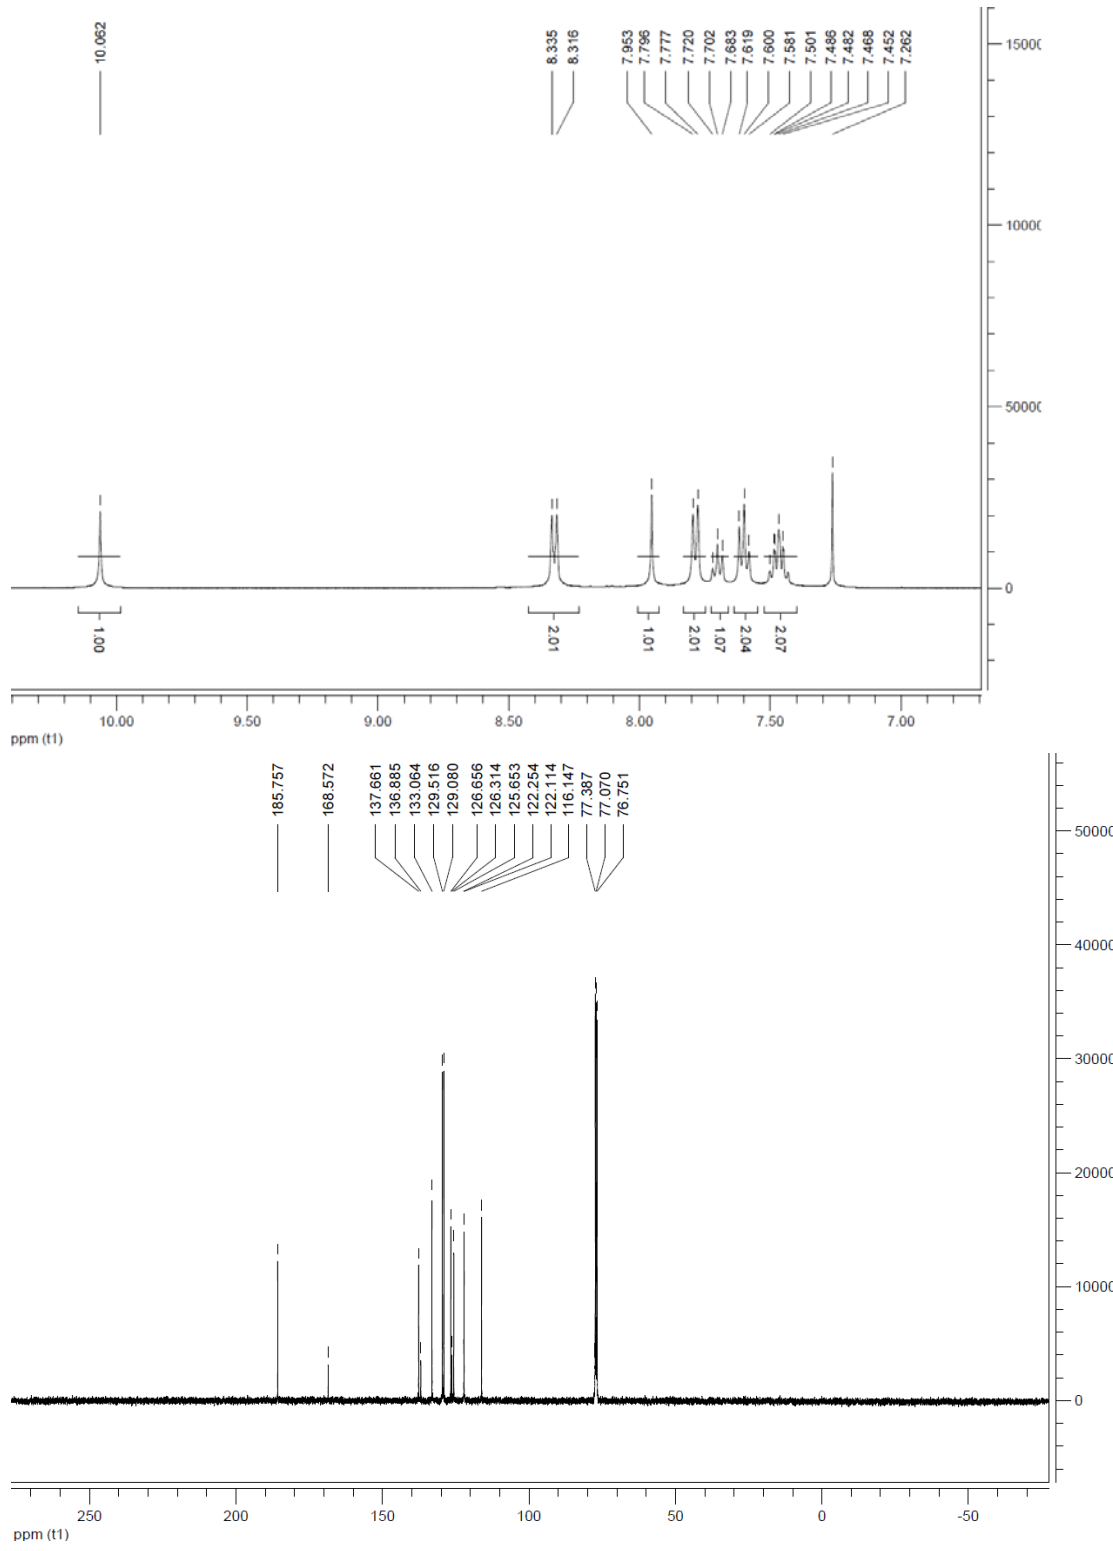

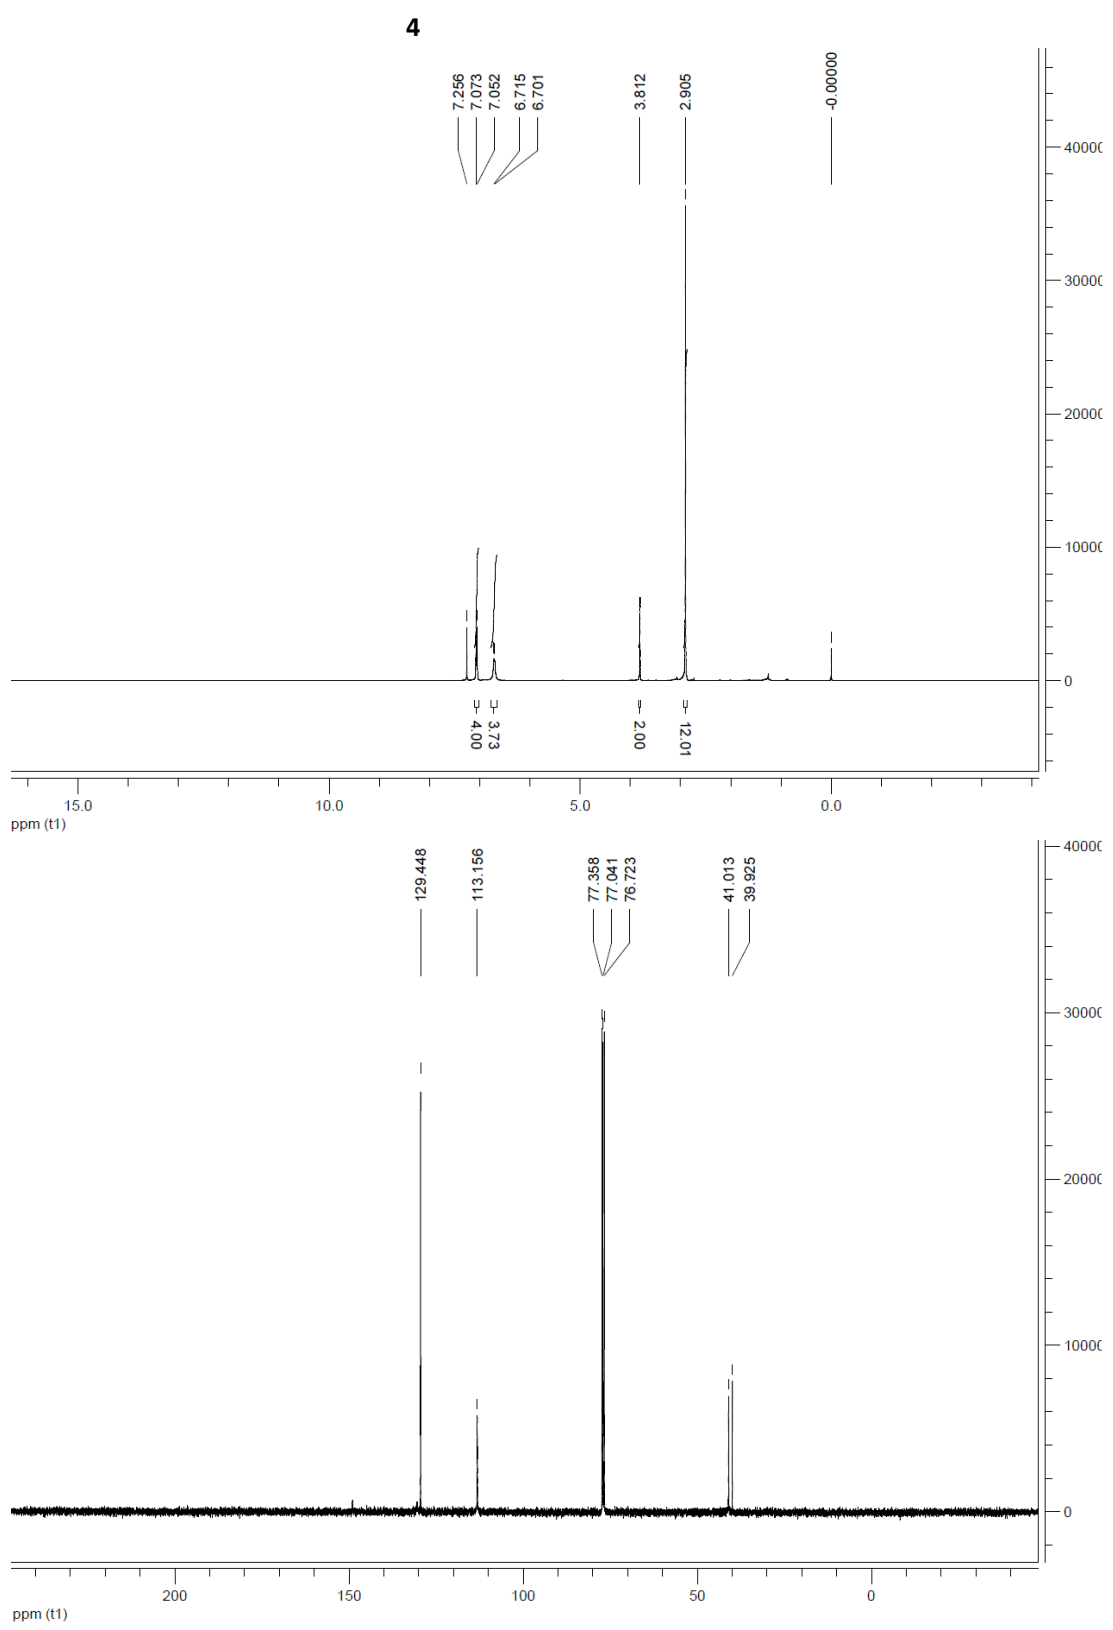

## 7. References

1. W. Wu and W. Su, *J. Am. Chem. Soc.*, 2011, **133**, 11924.
2. S.-C. Lin, F.-D. Yang, J.-S. Shiue, S.-M. Yang and J.-M. Fang, *J. Org. Chem.*, 1998, **63**, 2909.
3. D. F. Cummings, D. C. Canseco, P. Sheth, J. E. Johnson and J. A. Schetz, *Bioorg. Med. Chem.*, 2010, **18**, 4783.
4. H. Ueda, H. Satoh, K. Matsumoto, K. Sugimoto, T. Fukuyama and H. Tokuyama, *Angew. Chem. Int. Ed.*, 2009, **48**, 7600.
5. M. G. Bursavich, N. Brooijmans, L. Feldberg, I. Hollander, S. Kim, S. Lombardi, K. Park, R. Mallon and A. M. Gilbert, *Bioorg. Med. Chem. Lett.*, 2010, **20**, 2586.
6. N. R. Penthala, T. R. Yerramreddy and P. A. Crooks, *Bioorg. Med. Chem. Lett.*, 2011, **21**, 1411.
7. C. Sagnes, G. Fournet and B. Joseph, Synlett, 2009, 433.
8. R. Aggarwal, F. Benedetti, F. Berti, S. Buchini, A. Colombatti, F. Dinon, V. Galasso and S. Norbedo, *Chem. Eur. J.*, 2003, **9**, 3132.
9. S. Murata, M. Miura and M. Nomura, *J. Org. Chem.*, 1989, **54**, 4700.
